1 **DRAFT ORIGINAL ARTICLE**

2 **THE INDONESIA HEALTH WORKFORCE QUANTITY AND DISTRIBUTION**

3 Farizal Rizky Muharram<sup>1</sup>, Hanif Ardiansyah Sulistya<sup>2</sup>, Julian Benedict Swannjo<sup>2</sup>, Fikri Febrian  
4 Firmansyah<sup>2</sup>, Muhammad Masrur Rizal<sup>2</sup>, Alifina Izza<sup>2</sup>, Muhammad Atoillah Isfandiari<sup>3</sup>, Ninuk  
5 Dwi Ariningtyas<sup>4</sup>, Achmad Chusnu Romdhoni<sup>5\*</sup>.

6 **AFFILIATION**

7 1 Department of Global Health and Social Medicine, Harvard Medical School, Boston, MA

8 2 Advanced Research and Collaboration Center, Surabaya, Indonesia

9 3 Department of Epidemiology, Biostatistics and Demography, Health Promotion and Behavioral  
10 Science Faculty of Public Health, Surabaya, Indonesia

11 4 Department of Medicinal Education, Faculty of Medicine, Universitas Muhammadiyah  
12 Surabaya, Indonesia

13 5 Department of Otorhinolaryngology-Head-and-Neck Surgery, Airlangga University-Dr. Soetomo  
14 General Academic Hospital, Surabaya, Indonesia

15

16 **\*Corresponding Author:** Achmad Chusnu Romdhoni

17

18 **Short Title:** Indonesia Health Workforce Quantity and Distribution

19 **ABBREVIATION**

20 **HRH:** Human Research for Health; **HW:** Health Worker, **NHS:** National Health Services; **GP:**

21 General Practitioner; **UHC:** Universal Health Coverage

## 22 ABSTRACT

23 **Background:** Indonesia, the world's largest archipelago, faces unique challenges in distributing its  
24 health workforce across its diverse geographic barriers, leading to disparities in health worker  
25 number and distribution. By dissecting the distribution patterns and identifying areas of critical  
26 need, the research seeks to inform policy interventions that can more effectively bridge the gap on  
27 health worker quantity and inequity.

28 **Methods:** We conducted a descriptive analysis of healthcare workforce data across all 514 districts  
29 in Indonesia. The study focused on five categories of health workers: General Practitioners (GPs),  
30 medical specialists, dentists, nurses, and midwives. We calculated the health worker ratio to  
31 determine the availability of healthcare workers relative to the population. To evaluate the  
32 distribution of these workers, we employed the Gini Index as a measure of distribution equality.  
33 Additionally, we conducted a comparative metric approach to assess both the quantity and the  
34 equity of healthcare worker distribution across the districts.

35 **Results:** In Indonesia, the current health worker ratio stands at 3.84 per 1000 population, falling  
36 short of the WHO's threshold of 4.45 for achieving 80% Universal Health Coverage. This shortfall  
37 translates to a need for an additional 166,000 health workers. Our analysis reveals a varied  
38 distribution of health worker categories: while midwives show a relatively equitable distribution,  
39 specialists and dentists exhibit significant inequality, especially at the district level. The Gini Index,  
40 used to measure this inequality, indicates greater disparities at the district level compared to the  
41 provincial level. There has been notable progress in the distribution of medical specialists across  
42 provinces, with the between-provinces Gini Index for specialists decreasing from 0.57 in 1993 to  
43 0.44 in 2022. However, the inter-district Gini Index remains high at 0.53 in 2022, signifying a  
44 concentration of specialists in major cities and provincial capitals.

45 **Conclusion:** This study shows that human resources for health in Indonesia suffer not only in  
46 quantity but also in distribution. Our finding underscores the importance of considering inter-  
47 province and inter-district disparities to tailor policies to tackle unique problems each region faces.

48 **Keywords:** Health Workforce; Quantity; Distribution; Gini Index

### Evidence Before Study

- Prior research has established that the quantity and distribution of health workers are critical factors in improving life expectancy and are fundamental components of the health system.
- Following Indonesia's constitutional changes in 2001, which included the autonomy and decentralization of healthcare services, assessing the number of health workers at the district level has gained significant importance for determining national healthcare needs.
- There has been a notable gap in studies analyzing the quantity and distribution of health workers in Indonesia's district level. Previous research often missed the nuances of district-level challenges, focusing instead on broader, national-level assessments.

### What This Study Adds

- **First National Study on Health Workforce:** This is the first study of health workforce quantity and distribution at Indonesia's National level. so this paper serves as a basic reference for future research
- **Quantitative Analysis of Distribution Equity:** Utilizing the Gini Index, the study quantifies the level of inequality in the distribution of healthcare workers, offering a clear metric to guide policymakers in assessing and addressing regional disparities.
- **Identification of Regional Variations:** The study highlights significant regional variations, with some provinces showing an inequitable distribution of health workers, demonstrating a critical need for increased healthcare personnel and better distribution strategies.
- **Dual-dimensional assessment:** The study introduces a quadrant comparative approach that simultaneously evaluates the quantity of healthcare workers and the equity of their distribution across Indonesian provinces. This dual-dimensional analysis is a significant methodological advancement, providing a more holistic understanding of healthcare workforce allocation.

### How This Study Might Affect Research, Practice, and/or Policy

This study has the potential to become the basis of policy-making related to the distribution of health workers and provide constructive feedback and strategical insights that could be utilized to decrease the gap between health workers and their maldistribution.

## 50 INTRODUCTION

51 The landscape of global health is continually evolving, marked by the dynamic interplay between  
52 healthcare needs and the availability of healthcare professionals. At the heart of this landscape is the  
53 pivotal role of health workers, whose quantity and distribution are essential for effective healthcare  
54 delivery<sup>1</sup>. The World Health Organization (WHO) since 2005 and aligned with Sustainable  
55 Development Goals (SDGs) indicators underscore this significance, particularly after adjusting the  
56 need of universal health coverage<sup>2,3</sup>. Human resources for health, serving as the backbone of health  
57 systems, face the persistent challenge of achieving equitable distribution. With its unique  
58 geographical and demographic profile, Indonesia exemplifies this struggle, presenting a complex  
59 case for the distribution and availability of health workers.

60 Indonesia, the world's largest archipelago and fourth most populous nation, with its approximately  
61 17,000 islands, embodies these challenges in distributing its health workforce<sup>4</sup>. The country's vast  
62 and varied geography, encompassing remote areas, borders, and small islands, complicates the  
63 equitable distribution of healthcare services<sup>5</sup>. Additionally, the decentralized migration of health  
64 workers towards urban centers exacerbates the issue, leading to a disparity in healthcare availability  
65 between urban and rural or remote regions<sup>6</sup>.

66 The number of health workers is crucial in determining the effectiveness of healthcare delivery<sup>7</sup>.  
67 However, the issue extends beyond mere numbers; the distribution of these workers plays a critical  
68 role in ensuring that all regions, irrespective of their geographic or demographic characteristics,  
69 have access to adequate healthcare services. This challenge is further compounded by the issue of  
70 healthcare workforce production in Indonesia, which is not accompanied by equitable distribution<sup>8-</sup>  
71 <sup>10</sup>. The imbalance in the distribution of health workers, particularly in a geographically diverse  
72 country like Indonesia, presents a multifaceted challenge that needs comprehensive analysis and  
73 targeted interventions<sup>11</sup>.

74 The aim of this study is to provide an in-depth analysis of the current state of health workers in  
75 Indonesia, with a particular focus on both their quantity and distribution at the district level.  
76 Previous reports and research have often overlooked broader regional or national-level  
77 assessments<sup>12</sup>. This lack of detailed data has been a significant gap in understanding the true extent  
78 of the challenge faced by the Indonesian health system. By delving into the district-level dynamics  
79 of health worker distribution and quantity, this study seeks to bridge this knowledge gap and offer  
80 insights that could inform policy and practice, ultimately contributing to reducing inequities in  
81 healthcare access across Indonesia.

82

## 83 METHODS

84 We gather information from various sources, particularly formal government agencies and  
85 ministries that collect data on health resources, both published and unpublished. All the analysis  
86 needed will be done in the R using stats and the dineq package.

## 87 **Definition of Administrative Unit**

88 Indonesia's administrative area is divided into 34 provinces and 514 districts. Districts are  
89 categorized as cities (urban areas) or regencies(rural areas), with 416 districts and 98 cities reported  
90 in 2022. Health worker data is also aggregated into five major islands: Sumatra, Java, Kalimantan,  
91 Bali-Nusa, Sulawesi, and Maluku-Papua. This approach considers that health service coverage can  
92 extend beyond district and province administrative boundaries.

## 93 **Definition and Source of Health Worker Data**

94 Health workers are general practitioners, specialists, dentists, nurses, and midwives. Health workers  
95 must have gone through higher education and professional training<sup>13,14</sup>. This study consolidates all  
96 24 categories of specialists into a single group. General practitioners (GPs) practice both in primary  
97 and referral care, and between private and public. while specialists primarily operate within  
98 hospitals and private practices. Midwives are predominantly employed in primary care.

99 Number of health workers at the provincial-level data is derived from the “*Annual Indonesian*  
100 *Health Profile Book*” from 1990 to 2021. District-level data were gathered from the “*Minister of*  
101 *Health's Health Resources Database (SISDMK)*”. We extracted SISDMK data on 31 December  
102 2022. Data on doctors, dentists, and specialists are supplemented with Data on Members of the  
103 Indonesian Doctors Association and Doctors' Registration Data by the Indonesian Medical Council.  
104 The Health worker ratio will represent the number of health workers per 1,000 population within a  
105 geographic unit. Population estimate data, used as the health worker ratio's denominator, were  
106 retrieved from the Ministry of Internal Affairs' GIS data, with the most recent estimates dated 30  
107 June 2022.

## 108 **Benchmark of Health Worker Density**

109 The existing density of health workers will be compared with goals set by Indonesia's Directorate  
110 of Health Workforce Planning's Target Document, utilizing Data Envelopment Analysis (DEA) and  
111 Stochastic Frontier Analysis (SFA) for target ratio calculations (see Table 1). We will also  
112 compared to the World Health Organization (WHO) proposed threshold of health-worker ratio  
113 (including doctors, nurses, and midwives) of 4.45 per 1,000 people to meet 80% coverage of the  
114 Sustainable Development Goals (SDGs)<sup>15</sup>

| Table 1. Recommendation of Health Worker density |                 |                       |                                                                  |
|--------------------------------------------------|-----------------|-----------------------|------------------------------------------------------------------|
| Health Worker                                    | National Target | Others Recommendation | Source                                                           |
| GP                                               | 1:1000          | 1:1000                | Kumar <i>et.al.</i> , 2018 <sup>16</sup>                         |
| Specialist                                       | 0.2:1000        | 1:1000                | WHO                                                              |
| Dentist                                          | 0.2:1000        | 0.13:1000             | Pandya, <i>et.al.</i> , 2020 <sup>17</sup>                       |
| Nurse                                            | 2.4:1000        | 3.3:1000              | WHO                                                              |
| Midwifery                                        | 2:1000          | 11.4:1000 (female)    | The White Ribbon Alliance. 2017 <sup>18</sup>                    |
| All Health Worker                                | 5.8:1000        | 4.45: 1000            | WHO: Global strategy on human resources for health <sup>19</sup> |

## 115 **Distribution Analysis**

116 To analyze distribution, we will directly compare ratios between administrative, urban, and rural  
117 areas and use the Gini Index, as previously recommended in WHO Measuring Health Worker  
118 inequalities<sup>20 21-23</sup>. The Gini coefficient is a statistical metric obtained from the Lorenz curve,  
119 which measures the level of inequality in a distribution. It is expressed as a value between 0  
120 (indicating perfect equality) and 1 (indicating perfect inequality). We performed inter-provincial  
121 and within-province Gini Index, which has been prevalently used in prior research<sup>24-27</sup>. To further  
122 measure inequities between district, the inter-district Gini index will be used in this research<sup>28,29</sup>

## 123 **Quadrant Analysis Framework**

124 We made a quadrant analysis to evaluate the two facets of quantity and distribution, as depicted in  
125 Figure 1. This method involves plotting provinces on a two-dimensional plane defined by two axes:  
126 the Gini Index and the Health Worker (HW) Ratio. The quadrant framework categorizes provinces  
127 into four distinct groups based on their position relative to the median values of the Gini Index and  
128 HW Ratio. The resulting quadrants are labeled as follows:

- 129 1. **Scarce and Inequitable Province:** High Gini Index and Low HW Ratio, indicating a province  
130 with a shortage of health workers and a highly uneven distribution.
- 131 2. **Inequitable Province:** High Gini Index and High HW Ratio, suggesting a province with a  
132 sufficient number of health workers but an unequal distribution among the population.
- 133 3. **Scarce Province:** Low Gini Index and Low HW Ratio, pointing to a province with an overall  
134 scarcity of health workers but a relatively even distribution among the population.
- 135 4. **Ideal Province:** Low Gini Index and High HW Ratio, representing a province with both a high  
136 number of health workers and an equitable distribution.

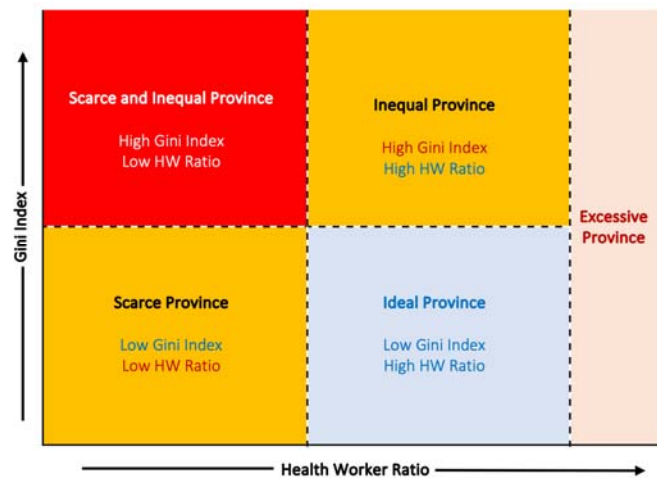

137 **Figure 1.** A Quadrant Analysis of Gini Index vs. Health Worker Ratio

138 This framework is intended to identify and visualize the disparities in health worker distribution  
139 across provinces. In line with the nature of Indonesia, decentralization pushes the provincial  
140 government to achieve equal growth within the province. This approach will inform policymakers  
141 at the provincial and national levels by highlighting areas of need and guiding targeted  
142 interventions.

143

## 144 **RESULTS**

### 145 **Quantity of Health Workers**

146 Indonesia's health workforce comprises 1,046,640, averaging 3.84 per 1,000 people nationally but  
147 varying widely across districts (0.31 to 19.08). Nurses are the largest group (531,214; 1.95 per  
148 1,000), followed by midwives (300,756; 1.10 per 1,000), general practitioners (145,602; 0.38 per  
149 1,000), specialists (41,893; 0.15 per 1,000), and dentists (27,177; 0.1 per 1,000). The nurse-to-  
150 doctor ratio is about 2.17 nationally.

151 In examining the distribution of health workers between urban and rural areas in Indonesia, clear  
152 disparities are evident across different medical professions. General Practitioners (GPs) in rural  
153 areas have a median ratio of 0.27 and an average of 0.31, contrasting sharply with urban areas,  
154 where the median ratio is substantially higher at 1.10 and the average is 1.34. The disparity is even  
155 more pronounced for dentists; in rural regions, they have a median ratio of 0.05 and an average of  
156 0.06, whereas in urban areas, these figures significantly increase to a median of 0.20 and an average  
157 of 0.27. Specialists present a similar pattern of distribution. In rural areas, the median ratio for  
158 specialists is 0.06 with an average of 0.08, which is markedly lower than in urban areas, where the  
159 median ratio rises to 0.35 and the average to 0.42.

160 Rural areas have median ratios of 0.87 for midwives and 1.26 for nurses, which are substantially  
161 lower compared to urban areas, where the median ratios are 0.86 for midwives and a significantly  
162 higher 3.18 for nurses. Overall, this data underscores a consistent trend of higher health worker

164 For most healthcare worker categories, the distribution is right-skewed, meaning that most rural and  
 165 urban areas have lower ratios of healthcare workers, with a few areas having much higher ratios.  
 166 The kurtosis values suggest that these distributions are leptokurtic, with a higher peak and heavier  
 167 tails than a normal distribution, particularly for GPs and dentists in rural areas and for urban nurses.  
 168

**Table 2.** Descriptive Statistics of Health workers density in Indonesia

|                                    | Min    | 25%     | Median    | Mean         | 75%       | Max       | Skewness | Kurtosis |
|------------------------------------|--------|---------|-----------|--------------|-----------|-----------|----------|----------|
| <b>NATIONAL</b>                    |        |         |           |              |           |           |          |          |
| Population                         | 25,015 | 425,613 | 1,056,965 | 1,283,218.61 | 1,865,647 | 5,385,219 | 2.73     | 10.41    |
| Physician Ratio                    | 0.02   | 0.22    | 0.31      | 0.53         | 0.63      | 5.42      | 4.28     | 26.7     |
| Specialist Ratio                   | 0      | 0.05    | 0.08      | 0.15         | 0.16      | 1.86      | 4.37     | 28.97    |
| Dentist Ratio                      | 0      | 0.03    | 0.05      | 0.10         | 0.10      | 1.52      | 6.42     | 63.73    |
| Midwife Ratio                      | 0.07   | 0.67    | 0.86      | 1.10         | 1.36      | 5.16      | 1.04     | 1.30     |
| Nurse Ratio                        | 0.22   | 1.07    | 1.44      | 1.95         | 2.54      | 12.03     | 1.63     | 4.53     |
| <b>Healthworker Ratio</b>          | 0.31   | 2.21    | 3.09      | 3.84         | 4.97      | 19.08     | 1.45     | 3.91     |
| <b>RURAL (REGENCIES) (n = 426)</b> |        |         |           |              |           |           |          |          |
| Population                         | 25,015 | 417,509 | 1,024,842 | 1,231,418.51 | 1,679,267 | 5,385,219 | 2.98     | 13.47    |
| Physician Ratio                    | 0.02   | 0.21    | 0.27      | 0.31         | 0.35      | 2.27      | 3.6      | 22.57    |
| Specialist Ratio                   | 0      | 0.05    | 0.06      | 0.08         | 0.10      | 0.57      | 2.86     | 15.22    |
| Dentist Ratio                      | 0      | 0.03    | 0.05      | 0.05         | 0.06      | 0.52      | 3.98     | 28.01    |
| Midwife Ratio                      | 0.07   | 0.68    | 0.87      | 1.13         | 1.45      | 5.16      | 0.99     | 1.16     |
| Nurse Ratio                        | 0.22   | 0.98    | 1.26      | 1.50         | 1.8       | 7.16      | 1.18     | 1.79     |
| <b>Healthworker Ratio</b>          | 0.31   | 2.04    | 2.6       | 3.08         | 3.68      | 12.48     | 0.9      | 0.94     |
| <b>URBAN (CITIES) (n=88)</b>       |        |         |           |              |           |           |          |          |
| Population                         | 34,096 | 531,570 | 1,266,194 | 1,472,195.8  | 2,470,972 | 3,274,716 | 1.94     | 2.97     |
| Physician Ratio                    | 0.21   | 0.82    | 1.10      | 1.34         | 1.58      | 5.42      | 2.61     | 8.41     |
| Specialist Ratio                   | 0.02   | 0.25    | 0.35      | 0.42         | 0.51      | 1.86      | 2.52     | 9.04     |
| Dentist Ratio                      | 0.02   | 0.13    | 0.20      | 0.27         | 0.35      | 1.52      | 3.98     | 20.64    |
| Midwife Ratio                      | 0.51   | 0.61    | 0.86      | 1.00         | 1.1       | 3.75      | 1.14     | 1.17     |
| Nurse Ratio                        | 1.55   | 2.54    | 3.18      | 3.61         | 4.16      | 12.03     | 1.46     | 3.01     |
| <b>Healthworker Ratio</b>          | 3.1    | 4.97    | 5.94      | 6.64         | 7.62      | 19.08     | 1.53     | 2.88     |

### 169 **Island and Provincial Levels Distribution**

170 Table 3 shows the distribution of health worker ratios across Indonesian islands and provinces. The  
 171 data reveals several disparities, with Java having the lowest health worker ratio (3.06 per 1,000  
 172 population) and Sulawesi the highest (5.04 per 1,000 population). Each island presents a distinct  
 173 health worker composition; notably, Bali Nusa Tenggara and Java have the highest GP ratios at  
 174 0.45 and 0.38, respectively. Java leads in specialist and dentist ratios (0.17 and 0.1) but has the  
 175 lowest ratios for nurses and midwives (1.69 and 0.72), suggesting an imbalance in healthcare  
 176 worker distribution.

177 Provincially, Aceh has the highest health worker ratio (7.68), followed by DKI Jakarta (6.23). The  
 178 lowest ratios are in West Java (2.44), Banten (2.69), and Central Java (2.83). Bali's GP ratio (0.98)  
 179 is close to the WHO-recommended physician ratio, and DKI Jakarta has the highest specialist ratio  
 180 (0.63). These figures indicate uneven healthcare resource allocation, with certain areas having a  
 181 high concentration of healthcare professionals and others facing severe shortages.



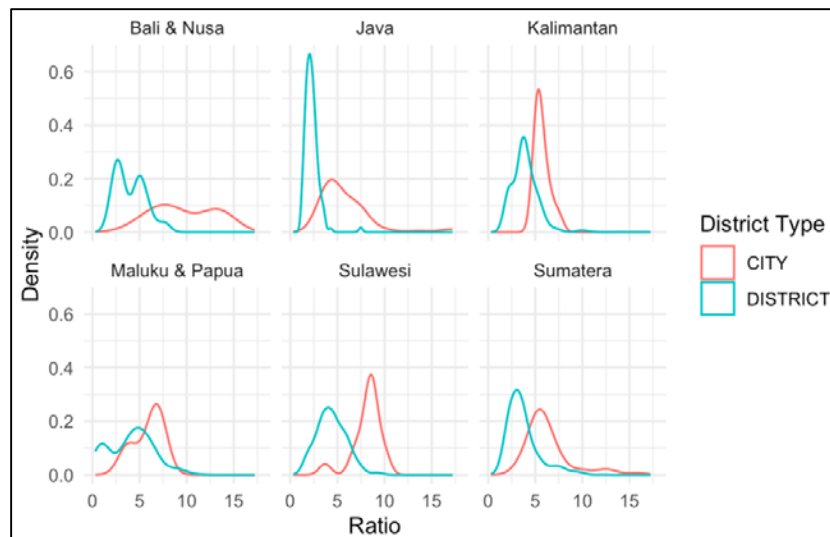

182 **Figure 2. Regional Health Worker Distribution by City and District: A Density Plot Comparison.** This set of  
183 density plots compares the distribution of health worker ratios across different Indonesian regions, distinguishing  
184 between city and district types. Peaks represent the most common ratios within each region, with red lines indicating  
185 city densities and blue lines for districts. The plots reveal variations in distribution patterns, with some regions showing  
186 distinct differences between city and district densities, potentially indicating disparities in health worker allocation.  
187

188 The density plot at figure 2 presents a comparative analysis of health worker (HW) ratios across  
189 different islands and regions in Indonesia, categorized by city and district types. In Bali and Nusa,  
190 the HW ratio distribution for cities and districts demonstrates a bimodal pattern, indicating two  
191 distinct groupings of HW ratios within each category. Java's distribution exhibits a stark peak for  
192 cities at a lower HW ratio, suggesting a uniformity in lower ratios among cities, in contrast to  
193 districts that show a broader, more varied distribution.

194 Kalimantan's data suggests a single, similar peak for both cities and districts, with cities having a  
195 marginally higher peak, implying a slight concentration of HW ratios within city areas. Meanwhile,  
196 Maluku & Papua reveal a significant contrast between cities and districts; cities have a flatter, more  
197 varied HW ratio distribution, whereas districts show a distinct, narrow peak at higher ratios.  
198 Sulawesi's density plot indicates a single peak for both city and district types, with the city peak  
199 being more pronounced, pointing towards a more consistent HW ratio among Sulawesi cities.

200 Sumatera's analysis reveals a higher peak for districts compared to cities, suggesting a trend towards  
201 higher HW ratios within district areas. Overall, the graph indicates significant regional variability in  
202 HW ratios, with certain trends such as the bimodal distribution in Bali & Nusa and the contrasting  
203 distributions in Maluku & Papua standing out.

204

**Table 3. Healthcare Workforce Distribution by Region: Population-to-Health Worker Ratios in Indonesia.**

The ratios are calculated per 1,000 population.

| REGIONAL GROUP            | POP                | GP            |       | Specialist   |       | Dentist      |       | Nurse         |       | Midwife       |       | All HW         |       |
|---------------------------|--------------------|---------------|-------|--------------|-------|--------------|-------|---------------|-------|---------------|-------|----------------|-------|
|                           |                    | n             | Ratio | n            | Ratio | n            | Ratio | n             | Ratio | n             | Ratio | n              | Ratio |
| <b>NATIONAL</b>           | <b>272,235,314</b> | <b>145602</b> | 0.53  | <b>41891</b> | 0.15  | <b>27177</b> | 0.10  | <b>531214</b> | 1.95  | <b>300756</b> | 1.10  | <b>1046640</b> | 3.84  |
| <b>CITY</b>               | <b>58,567,886</b>  | 78557         | 1.34  | 24772        | 0.42  | 15608        | 0.27  | 211326        | 3.61  | 58721         | 1.00  | 388984         | 6.64  |
| <b>DISTRICT</b>           | <b>213,667,428</b> | 67045         | 0.31  | 17119        | 0.08  | 11569        | 0.05  | 319888        | 1.50  | 242035        | 1.13  | 657656         | 3.08  |
| <b>BALI NUSA</b>          | <b>15,028,974</b>  | <b>9139</b>   | 0.61  | <b>2326</b>  | 0.15  | <b>1259</b>  | 0.08  | <b>36937</b>  | 2.46  | <b>22769</b>  | 1.52  | <b>72430</b>   | 4.82  |
| Bali                      | 4,287,193          | 5754          | 1.34  | 1541         | 0.36  | 839          | 0.20  | 12261         | 2.86  | 5835          | 1.36  | 26230          | 6.12  |
| West Nusa Tenggara        | 5,359,579          | 1657          | 0.31  | 413          | 0.08  | 212          | 0.04  | 10779         | 2.01  | 6393          | 1.19  | 19454          | 3.63  |
| East Nusa Tenggara        | 5,382,202          | 1728          | 0.32  | 372          | 0.07  | 208          | 0.04  | 13897         | 2.58  | 10541         | 1.96  | 26746          | 4.97  |
| <b>JAVA</b>               | <b>153,344,799</b> | <b>84221</b>  | 0.55  | <b>25848</b> | 0.17  | <b>17476</b> | 0.11  | <b>259769</b> | 1.69  | <b>110580</b> | 0.72  | <b>497894</b>  | 3.25  |
| Banten                    | 12,142,696         | 6220          | 0.51  | 1745         | 0.14  | 1136         | 0.09  | 16764         | 1.38  | 8719          | 0.72  | 34584          | 2.85  |
| D.I. Yogyakarta           | 3,677,522          | 4343          | 1.18  | 997          | 0.27  | 975          | 0.27  | 10715         | 2.91  | 2890          | 0.79  | 19920          | 5.42  |
| D.K.I. Jakarta            | 11,249,585         | 19493         | 1.73  | 7071         | 0.63  | 5002         | 0.44  | 38819         | 3.45  | 7582          | 0.67  | 77967          | 6.93  |
| West Java                 | 48,623,371         | 19863         | 0.41  | 5803         | 0.12  | 3357         | 0.07  | 65009         | 1.34  | 30922         | 0.64  | 124954         | 2.57  |
| Central Java              | 37,323,519         | 15156         | 0.41  | 4528         | 0.12  | 2224         | 0.06  | 59749         | 1.60  | 28892         | 0.77  | 110549         | 2.96  |
| East Java                 | 40,328,106         | 19146         | 0.47  | 5704         | 0.14  | 4782         | 0.12  | 68713         | 1.70  | 31575         | 0.78  | 129920         | 3.22  |
| <b>KALIMANTAN</b>         | <b>16,779,243</b>  | <b>8089</b>   | 0.48  | <b>2240</b>  | 0.13  | <b>1442</b>  | 0.09  | <b>41324</b>  | 2.46  | <b>21984</b>  | 1.31  | <b>75079</b>   | 4.47  |
| West Kalimantan           | 5,482,046          | 1632          | 0.30  | 404          | 0.07  | 236          | 0.04  | 10876         | 1.98  | 6160          | 1.12  | 19308          | 3.52  |
| South Kalimantan          | 4,069,123          | 2087          | 0.51  | 668          | 0.16  | 504          | 0.12  | 9283          | 2.28  | 5292          | 1.30  | 17834          | 4.38  |
| Central Kalimantan        | 2,672,790          | 1112          | 0.42  | 294          | 0.11  | 156          | 0.06  | 7637          | 2.86  | 4435          | 1.66  | 13634          | 5.10  |
| East Kalimantan           | 3,847,792          | 2790          | 0.73  | 743          | 0.19  | 468          | 0.12  | 10943         | 2.84  | 4882          | 1.27  | 19826          | 5.15  |
| North Kalimantan          | 707,492            | 468           | 0.66  | 131          | 0.19  | 78           | 0.11  | 2585          | 3.65  | 1215          | 1.72  | 4477           | 6.33  |
| <b>MALUKU &amp; PAPUA</b> | <b>8,634,347</b>   | <b>3412</b>   | 0.40  | <b>717</b>   | 0.08  | <b>341</b>   | 0.04  | <b>23000</b>  | 2.66  | <b>11254</b>  | 1.30  | <b>38724</b>   | 4.48  |
| Maluku                    | 1,886,735          | 920           | 0.49  | 171          | 0.09  | 90           | 0.05  | 6330          | 3.36  | 2575          | 1.36  | 10086          | 5.35  |
| North Maluku              | 1,317,333          | 571           | 0.43  | 117          | 0.09  | 63           | 0.05  | 3365          | 2.55  | 2740          | 2.08  | 6856           | 5.20  |
| Papua                     | 4,272,108          | 1282          | 0.30  | 303          | 0.07  | 120          | 0.03  | 8961          | 2.10  | 3798          | 0.89  | 14464          | 3.39  |
| West Papua                | 1,158,171          | 639           | 0.55  | 126          | 0.11  | 68           | 0.06  | 4344          | 3.75  | 2141          | 1.85  | 7318           | 6.32  |
| <b>SULAWESI</b>           | <b>19,989,579</b>  | <b>10662</b>  | 0.53  | <b>2981</b>  | 0.15  | <b>1833</b>  | 0.09  | <b>54455</b>  | 2.72  | <b>33924</b>  | 1.70  | <b>103855</b>  | 5.20  |
| Gorontalo                 | 1,203,921          | 531           | 0.44  | 148          | 0.12  | 72           | 0.06  | 3017          | 2.51  | 1815          | 1.51  | 5583           | 4.64  |
| West Sulawesi             | 1,441,712          | 360           | 0.25  | 100          | 0.07  | 102          | 0.07  | 3382          | 2.35  | 3401          | 2.36  | 7345           | 5.09  |
| South Sulawesi            | 8,980,741          | 4994          | 0.56  | 1611         | 0.18  | 1051         | 0.12  | 22365         | 2.49  | 13716         | 1.53  | 43737          | 4.87  |
| Central Sulawesi          | 3,074,958          | 1239          | 0.40  | 315          | 0.10  | 174          | 0.06  | 8789          | 2.86  | 6195          | 2.01  | 16712          | 5.43  |
| South-East Sulawesi       | 2,625,494          | 1017          | 0.39  | 250          | 0.10  | 238          | 0.09  | 7876          | 3.00  | 6195          | 2.36  | 15576          | 5.93  |
| North Sulawesi            | 2,662,753          | 2521          | 0.95  | 557          | 0.21  | 196          | 0.07  | 9026          | 3.39  | 2602          | 0.98  | 14902          | 5.60  |
| <b>SUMATERA</b>           | <b>58,458,372</b>  | <b>30079</b>  | 0.51  | <b>7779</b>  | 0.13  | <b>4826</b>  | 0.08  | <b>115729</b> | 1.98  | <b>100245</b> | 1.71  | <b>258658</b>  | 4.42  |
| Aceh                      | 5,356,965          | 3469          | 0.65  | 889          | 0.17  | 489          | 0.09  | 18178         | 3.39  | 19017         | 3.55  | 42042          | 7.85  |
| Bengkulu                  | 2,041,265          | 903           | 0.44  | 211          | 0.10  | 154          | 0.08  | 5077          | 2.49  | 4294          | 2.10  | 10639          | 5.21  |
| Jambi                     | 3,600,625          | 1684          | 0.47  | 405          | 0.11  | 276          | 0.08  | 8252          | 2.29  | 6763          | 1.88  | 17380          | 4.83  |
| Bangka Belitung Isl.      | 1,464,663          | 826           | 0.56  | 221          | 0.15  | 135          | 0.09  | 3860          | 2.64  | 1696          | 1.16  | 6738           | 4.60  |
| Riau Island               | 2,072,922          | 1623          | 0.78  | 405          | 0.20  | 277          | 0.13  | 5019          | 2.42  | 2567          | 1.24  | 9891           | 4.77  |
| Lampung                   | 8,866,673          | 2803          | 0.32  | 693          | 0.08  | 282          | 0.03  | 12216         | 1.38  | 10458         | 1.18  | 26452          | 2.98  |
| Riau                      | 6,032,801          | 4015          | 0.67  | 917          | 0.15  | 626          | 0.10  | 11405         | 1.89  | 8736          | 1.45  | 25699          | 4.26  |
| West Sumatera             | 5,481,484          | 3398          | 0.62  | 999          | 0.18  | 552          | 0.10  | 11291         | 2.06  | 7800          | 1.42  | 24040          | 4.39  |
| South Sumatera            | 8,489,000          | 3625          | 0.43  | 967          | 0.11  | 431          | 0.05  | 16032         | 1.89  | 14512         | 1.71  | 35567          | 4.19  |
| North Sumatera            | 15,051,94          | 7733          | 0.51  | 2072         | 0.14  | 1604         | 0.11  | 24399         | 1.62  | 24402         | 1.62  | 60210          | 4.00  |

### 205 District-Level Distribution

206 Figure 3 shows a distinct change in the mapping of health workers between the provincial-level  
 207 aggregate ratio(1a) and district-level aggregate ratio(1b), especially in Java Island. Health workers  
 208 are concentrated in cities (small areas with a high ratio of health workers), and lack of health  
 209 workers in more rural areas in Java. Despite having the largest number of healthcare workers, by  
 210 comparing the number to their population, the ratio in most districts in Java remained below  
 211 Indonesia and WHO-recommended density (Figure 4).

212

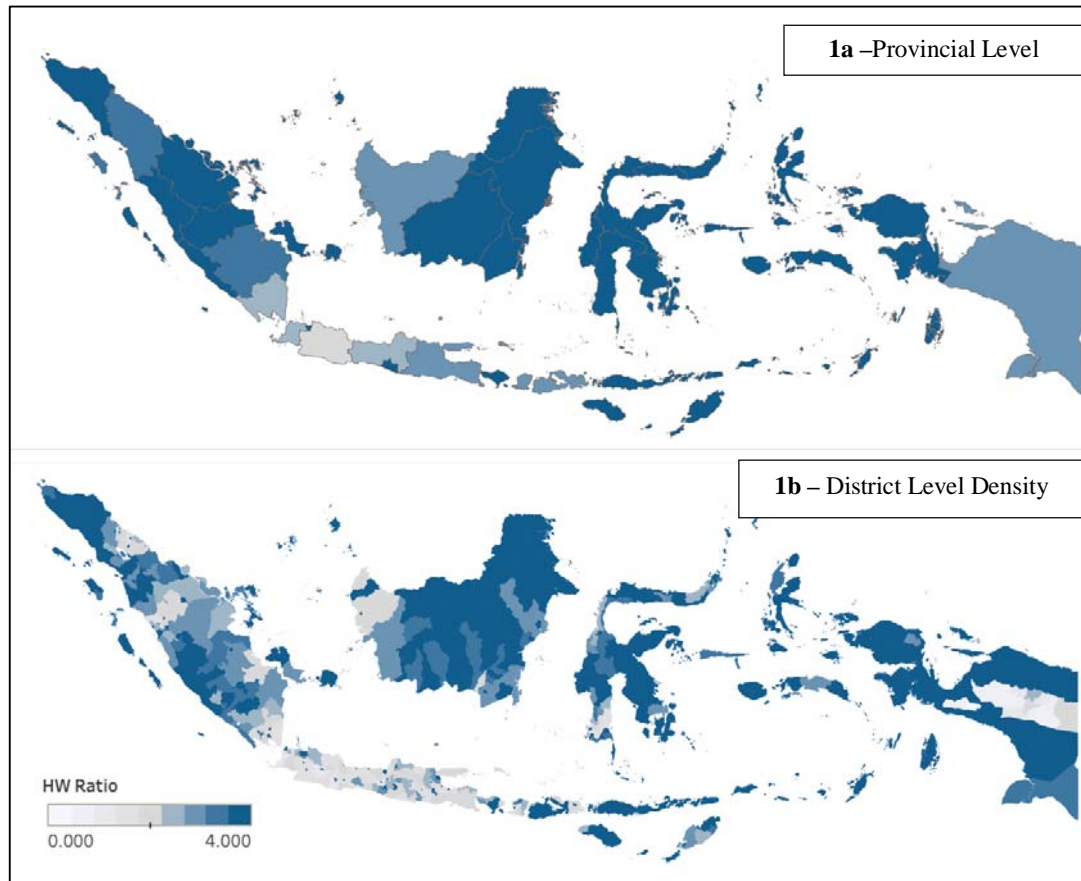

213 **Figure 3. Geographic Distribution of Health Worker Ratios in Indonesia: A Comparative View at Provincial and**  
 214 **District Levels.** This map pair illustrates the health worker (HW) ratio across Indonesia's provinces (1a) and districts  
 215 (1b). Darker shades of blue indicate higher HW ratios, with the scale ranging from 0 to 4. The provincial-level map  
 216 shows broader trends, while the district-level map provides a more granified perspective, revealing significant  
 217 variations within provinces.

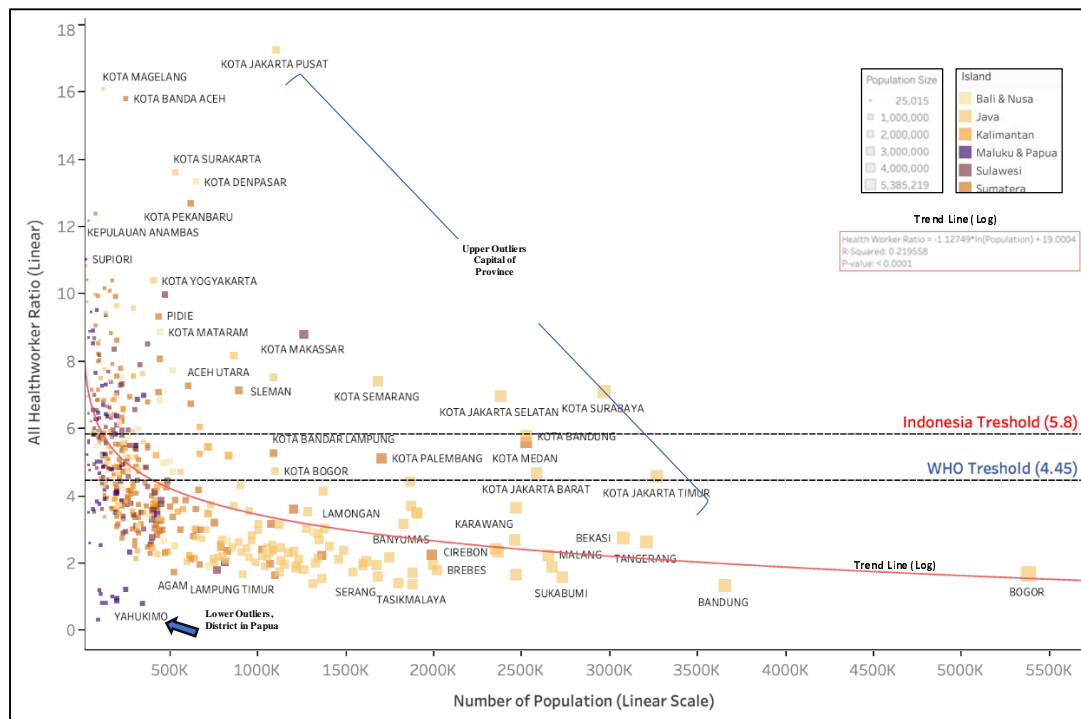

218 **Figure 4. Population vs. Health Worker Ratio Across Indonesian Regions: Scaling and WHO Standards**  
 219 **Compliance.** The scatter plot displays the relationship between the logarithm of the population size and the health  
 220 worker ratio for various Indonesian regions. Each point represents a region, with the WHO-recommended ratio as a  
 221 reference line. The plot highlights disparities in health worker distribution relative to population, with some regions  
 222 significantly above or below the WHO benchmark.

223 The Figure 4 scatter plot displays a wide variance in health worker-to-population ratios. The graph  
224 indicates that most regions have health worker ratios below the density target except for a few  
225 districts that are also the province's capital. Several regions, particularly in Papua, such as  
226 Yahukimo, are identified as lower outliers with a deficiency in health worker density.  
227 Districts with a larger population tend to have fewer health workers. A logarithmic trend line fitted  
228 to the data demonstrates a decremental trend, suggesting that regions with larger populations tend to  
229 have a lower health-worker ratio. The Logarithmic trend line equation quantifies the relationship  
230 between the population size and the health worker ratio,  $\text{Health Worker Ratio} = -$   
231  $1.2749 \cdot \ln(\text{Population}) + 19.004$ . The coefficient of determination, R-squared (0.215958).  
232 Moreover, the distribution of health worker ratios exhibits right-skewness. This skewness indicates  
233 that while most regions are understaffed, a few are exceptionally well-staffed.

### 234 **Inequity in Distribution**

235 The Gini Index has demonstrated variable trends over the past three decades, as depicted in Figure 4  
236 and Table 4. For General Practitioners (GPs), the provincial Gini Index increased from 0.35 in 1992  
237 to a peak of 0.49 in 2003 before declining to 0.39 in 2012 and rising again to 0.42 in 2022. This  
238 fluctuation suggests changes in the equality of GP distribution over time. Dentists and nurses also  
239 experienced an increase in provincial inequality, with their Gini Indexes rising to 0.49 and 0.40,  
240 respectively, in 2022. Midwives, however, showed an improvement in equality from 1992 to 2022,  
241 with the Gini Index decreasing from 0.38 to 0.35.

**Table 4. Provincial and District-Level Inequality in Health Worker Distribution: Gini Index from 1992 to 2022.** This table presents the Gini Index scores for different health worker categories, measuring the inequality in their distribution across provinces from 1992 to 2022 and at the district level in 2022. Data Unavailability is marked as '...'. .

| Health worker | Between Province Gini Index |      |      |      |      |      |      | Between District Gini Index 2022 |
|---------------|-----------------------------|------|------|------|------|------|------|----------------------------------|
|               | 1992                        | 1997 | 2003 | 2008 | 2012 | 2017 | 2022 |                                  |
| GP            | 0.35                        | 0.45 | 0.49 | 0.42 | 0.39 | 0.39 | 0.42 | <b>0.46</b>                      |
| Specialist    | 0.57                        | 0.57 | ...  | ...  | 0.42 | 0.45 | 0.44 | <b>0.53</b>                      |
| Dentist       | 0.38                        | 0.43 | 0.41 | 0.42 | 0.40 | 0.43 | 0.49 | <b>0.52</b>                      |
| Nurse         | 0.34                        | 0.36 | 0.37 | ...  | 0.36 | 0.38 | 0.40 | 0.33                             |
| Midwife       | 0.38                        | 0.38 | 0.39 | 0.39 | 0.41 | 0.36 | 0.35 | 0.31                             |

242  
243 Disparities at the district level, recorded for 2022, reveal a more pronounced inequality for health  
244 workers than at the provincial level. GPs saw their district-level Gini Index escalate to 0.46, dentists  
245 to 0.52, and specialists to the highest at 0.53. In contrast, Nurses and midwives exhibited a reduced  
246 inequality at the district level, with a Gini Index of 0.33 and 0.31, respectively, signifying a more  
247 between-province inequality rather than relatively equal distribution across districts.

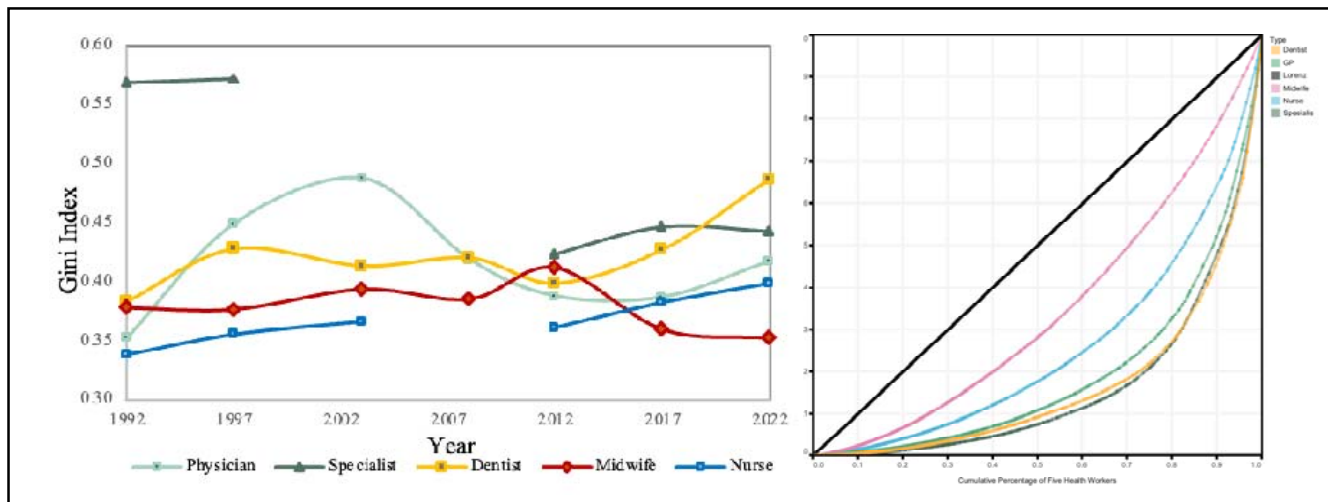

248 **Figure 5. Trends and Disparities in Health Worker Distribution: Gini Index Over Time and Lorenz Curve**  
249 **Analysis.** The graph comprises two panels: the left shows the Gini Index for different health worker over 30  
250 years, indicating inequality levels within each sector. The right panel's Lorenz Curves visualize the actual  
251 distribution equity for these professions Each color represents a distinct healthcare role, ensuring consistency  
252 across both visual analyses.

253 Supported by the Lorenz curves, it suggests that the bottom percentage of districts have  
254 significantly fewer health workers than would be expected in an equal distribution, especially for  
255 GPs, specialists, and dentists. The middle of the distribution for these categories also shows a  
256 considerable gap from the line of equality, indicating that the Gini index's sensitivity to the middle  
257 distribution reflects the reality of the distribution of health workers. The top district(s) seem to have  
258 a disproportionately high number of health workers, especially specialists and dentists, as indicated  
259 by the curves' steep rise as they approach 100%.

## 260 **Scarcity and Inequity**

261 Figure 6 offers a visual evaluation of health worker distribution across Indonesian regions. The y-  
262 axis is the Gini Index to assess equity in distribution against the x-axis as health worker ratios for  
263 various categories, including general practitioners, specialists, dentists, midwives, and nurses.

264 The health worker scatterplot illustrates a widespread distribution across the provinces, with a  
265 noticeable lean towards lower ratios, which suggests a general scarcity of health workers in many  
266 areas. North Sumatra, in particular, registers a high Gini Index coupled with a low health-worker  
267 ratio, underscoring an urgent need for redistribution and an increase in the health workforce.

268 The scatterplots for physicians, specialists, and dentists display a similar pattern, with most  
269 provinces failing to meet minimum health worker targets. With exceptions such as Jakarta,  
270 Yogyakarta, and Bali that exceed these targets. With its five districts and a substantial physician  
271 population, Jakarta is uniquely situated in the bottom-right quadrant, highlighting an oversupply of  
272 physicians compared to other regions clustered to the left. Specialists are predominantly located in  
273 the upper-left quadrant, indicating a skewed distribution that favors urban centers or provincial  
274 capitals and suggests a concentration of specialists in fewer, more developed areas. with

275 Nurses exhibit the most equitable distribution, with only Papua showing significant disparities.  
 276 However, the range between the highest and lowest ratios remains considerable, from 1.2 to 3.6 per  
 277 1,000. The Midwives ratio plot identifies Aceh as the only province exceeding the equity threshold.  
 278 Conversely, Jakarta, typically lower-right in other health worker categories, deviates in the case of  
 279 Midwife, showing a surprisingly low ratio and positioning it towards the left quadrant.

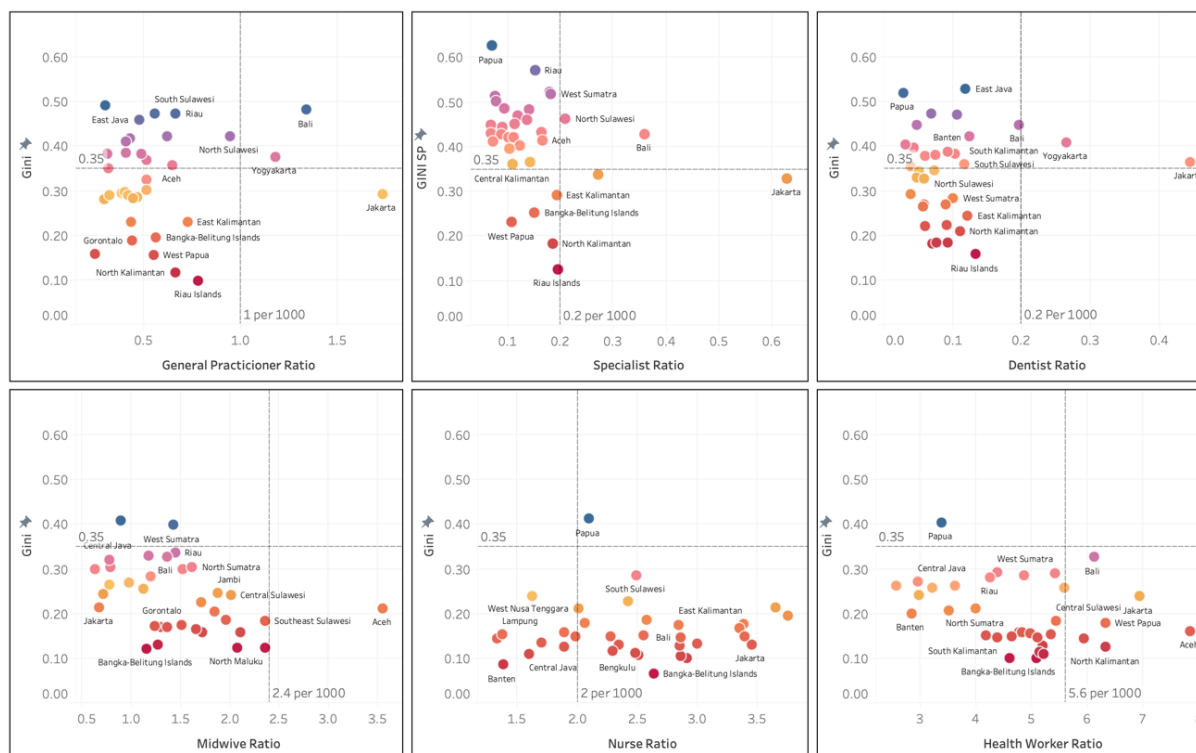

280 **Figure 6. Comparative Analysis of Health Worker Distribution Across Regions: Gini Index vs.**  
 281 **Various Health Worker Ratios.** (Each scatter plot represents a different category of health workers, with  
 282 the Gini index on the vertical axis and the respective health worker ratio on the horizontal axis. Dot  
 283 represents a province, with blue shades indicating regions with a higher Gini of health. The dashed line for  
 284 Gini referenced 0.35 Gini Ratio, the target for equality. Dashed line for Ratio referenced to national Target  
 285 for each health worker)

## 286 DISCUSSION

### 287 Quantity of Health Workers

288 Indonesia's archipelagic geography, with its varied terrain and areas isolated by mountains and  
 289 oceans, adds to the distribution challenges. Among its 80,000 villages, over 20,000 face  
 290 geographical difficulties that obstruct access to healthcare. As of 2022, Indonesia's health-worker  
 291 ratio is 3.84. The threshold set by WHO to achieve 80% Universal Health Coverage is 4.45—  
 292 requiring an additional 166,000 health workers to surpass the 4.45 threshold.<sup>30</sup> Indonesia's lack of  
 293 active GPs and Specialists requires attention (0.64 physicians per 1,000 population). Low compared  
 294 to other LMIC Nations such as India (0.73 per 1,000), China (2.4 doctors per 1,000), and other  
 295 ASEAN Countries (Singapore (2.29), the Philippines (0.6), and Malaysia (1.54).)<sup>31</sup>. Indonesia must  
 296 add up to 100,000 physicians to meet the threshold.<sup>17–20</sup>

## 298 **Decomposition of Inequity**

299 Contrary to the general perception of Java being saturated with health workers. By numbers, Java  
300 has the most healthcare workers, but Java has the lesser density of total health workers, mainly  
301 caused by the low number of nurses and midwives. Java is the only island with a midwives ratio  
302 lower than 1 and a nurse ratio lower than 2 per 1000 population. However, Java is also the island  
303 with the highest ratio of specialists (0.17), while Maluku and Papua had a ratio lower than half of  
304 Java's (0.8).

305 Most islands have nearly reached the WHO threshold, with only Java (3.52) and Sumatra (4.42) still  
306 below it. However, the high population on these islands significantly affects the national average of  
307 health workers. None of the islands have yet met the Indonesian Government's threshold of 5.8  
308 health workers per 1000 population, with Sulawesi coming closest at 5.2.

309 The key issue lies in the composition of health workers. Java faces a shortage of nurses and  
310 midwives despite having a relatively high number of doctors, though still below the threshold. In  
311 contrast, islands outside of Java have a relative abundance of nurses and midwives but a scarcity of  
312 doctors.<sup>32</sup> This imbalance in the distribution of health workers can be addressed through aggressive  
313 policy measures and enhanced nurse education, as demonstrated by China's experience. In China,  
314 around 2003, the ratio of nurses to physicians was quite low. However, recent data indicates a  
315 significant improvement, with the ratio rising from 1 nurse per 1000 population in 2003 to 4.1  
316 nurses per 1000 population in 2018.<sup>33</sup>

317 There is a profound disparity between urban and rural areas. Up to 50% of the total GP was in the  
318 City, despite the city population being only 20% of the total Population. That's also happening in  
319 India, where Out of all qualified workers, 77.4% were located in urban areas, even though the urban  
320 population is only 31% of the country's total population. Cities exhibit higher mean ratios across all  
321 healthcare workforce categories. Like other low- and lower-middle-income nations, the city tends to  
322 have a more significant health worker density.<sup>23,34-42</sup> While still skewed, the midwife and nurse  
323 ratios are less severe.<sup>43</sup> This finding is consistent with other research that found an uneven  
324 distribution of the total health workforce between rural and urban areas.<sup>44-46</sup>

## 325 **Inequity Indicator**

326 The overall trend indicates that while some health worker categories, like midwives, have achieved  
327 an equal distribution, others, particularly specialists and dentists, face higher levels of inequality,  
328 especially considering the district level. This discrepancy is highlighted by the Gini Index  
329 differences between the provincial and district levels, with an apparent increase in inequality at the  
330 finer scale of districts for most health worker categories.

331 There has been some progress in equalizing the distribution of medical specialists across provinces.  
332 The between-provinces Gini Index For Specialists remarkably dropped from 0.57 in 1993 to 0.44 in  
333 2022. However, the Inter-district Gini Index is very high at 0.53 in 2022. This implies that

334 specialists are still saturated in the preferable district, huge cities, and the province's capital.<sup>34,47,48</sup>  
335 Measuring only the between-province Gini Index will mask the disparities within provinces and  
336 interdistricts.  
337 Comparative studies from western China, a less affluent region compared to the eastern and  
338 southern parts of the country, exhibit similar inequality trends. The Physician Gini Index here  
339 stands at 0.46. The World Health Organization's last published data from 2010 shows relatively  
340 more minor interdistrict disparities in China, with a Gini Index of 0.362 for doctors and 0.471 for  
341 nurses. In India, these figures are 0.436 for doctors and 0.527 for nurses<sup>49,50</sup>. The situation in  
342 Indonesia contrasts with both China and India, as it exhibits a higher Gini Index for general  
343 physicians and specialists than nurses.

#### 344 **Two Faces of Health Worker Problem in Indonesia: Inequity and Scarcity**

345 The quadrant analysis provides a multidimensional view of healthcare workforce distribution across  
346 regions. It highlights the areas of need and the complexity of issues like scarcity and inequality that  
347 often overlap, making it difficult to discern the underlying causes and appropriate interventions.  
348 The upper-right quadrant has a high ratio of health workers, but resources are not evenly spread  
349 across the province. Bali serves as an illustrative case within this analysis. For instance, urban  
350 centers like Denpasar City might be well-staffed, while more remote areas suffer from a dearth of  
351 healthcare professionals. Addressing this imbalance requires policies incentivizing healthcare  
352 workers to relocate to underserved areas or increasing the training and recruitment of health  
353 workers specifically for these regions.  
354 The upper-left quadrant represents a more critical scenario, as seen with East Java and Papua  
355 regions. The inequality in their distribution worsens the simultaneously general scarcity of health  
356 workers. Such provinces struggle with redistribution because the overall number of health workers  
357 is too low to meet even the minimum needs. To mitigate this, a two-pronged approach is essential:  
358 boosting the healthcare workforce numbers through training and recruitment and ensuring retention  
359 in underserved areas, perhaps through enhanced benefits, better working conditions, or other  
360 incentives.  
361 From these findings, we can assume that Indonesia faces a challenge in evenly distributing  
362 healthcare professionals, with rural areas experiencing more pronounced shortages. To date, health  
363 equity hasn't been prioritized as a main criterion for evaluating the success of health programs.<sup>51</sup>  
364 Policy interventions to incentivize healthcare professionals to work in underserved areas, scaling up  
365 healthcare infrastructure<sup>35</sup> and education programs to meet the demand in regions with lower  
366 healthcare workforce ratios.<sup>32,52,53</sup>

367



368 WHO emphasizes the necessity of district-level reporting of health worker data. While provincial-  
369 level data offers a general overview, it often fails to represent the situation at the district level.  
370 High-level aggregated data can obscure crucial specifics about the distribution and availability of  
371 health workers at the subregional level<sup>51</sup>. The strain from a lack of healthcare workers was apparent  
372 during the COVID-19 pandemic. Healthcare services almost collapsed during the pandemic peak.  
373 Any decrease in healthcare workers led to longer working hours for the remaining staff. This  
374 created a domino effect of increasing health workers' loads<sup>54</sup>. In maternity care, World Bank  
375 statistics reveal that maternal mortality rates in Indonesia have persistently remained relatively high  
376 from 2017 to 2021 compared to other Southeast Asian countries. A shortage of healthcare  
377 professionals is one critical factor influencing the heightened maternal mortality rate in  
378 Indonesia<sup>55,56</sup>. NCD demands a workforce for every step, especially preventive care<sup>57</sup>.  
379 Hypertension in Indonesia increased from 25.8% of the population in 2013 to 34.1% in 2018.  
380 Notably, many hypertension cases remain asymptomatic, leading to a high prevalence of  
381 undiagnosed.

## 382 **Limitation**

383 During data collection, we found notable discrepancies between the numbers and distribution of  
384 General Physicians and Specialists as reported by the medical association, Medical Council, and  
385 Ministry of Health. These inconsistencies likely stem from the council's reliance on correspondence  
386 addresses rather than the actual practice locations of medical doctors. Ministry of Health data is  
387 much more focused on public health center workers. We acknowledge limitations in the IDI data,  
388 primarily due to a five-year delay from a patient's death to the data's release.

## 389 **CONCLUSIONS**

390 The imbalance in the distribution of health workers in Indonesia is a burden for this country.  
391 Government policy factors, security, economic conditions, individual characteristics, income access  
392 to children's education, knowledge development, and areas with a better socioeconomic scope will  
393 be more attractive to health workers, especially specialist doctors.

394 The health workforce improvement agenda must focus on both increasing the number of health  
395 worker and distribute it equally to all people. Central government play a huge role in improving  
396 health worker production and distribution to area needed, and Local governments play a vital role in  
397 healthcare worker retention. Tailor strategies to local contexts, improve working conditions, offer  
398 professional development, and create supportive environments. Engage communities to foster  
399 belonging, boosting job satisfaction and retention.

## 400 **DECLARATION**

401 **Ethics approval an consent to participate**

402 Not applicable

403

404 **Availability of data and materials**

405 Data is available by requesting an application through email to the corresponding author.

406 **Competing interests**

407 All authors and contributors to the study stated that they had no conflict of interest.

408 **Funding**

409 The study was conducted with Research Grant from General Directorate of Higher Education,

410 Ministry of Education and Culture of Indonesia (DIPA-023.17.1.690523/2023).

411

412 **Authors' contributions**

413 **Conceptualization:** Farizal Rizky Muharram, Achmad Chusnu Romdhoni

414 **Formal analysis:** Farizal Rizky Muharram, Sudhir Anand, Hanif Ardiansyah Sulistya, Fikri

415 Febrian Firmansyah, Julian Benedict Swannjo

416 **Methodology:** Farizal Rizky Muharram, Hanif Ardiansyah Sulistya, Fikri Febrian Firmansyah,

417 Julian Benedict Swannjo, Muhammad Masrur Rizal

418 **Project administration:** Alifina Izza, Muhammad Atoillah Isfandiari, Ninuk Dwi Ariningtyas

419 **Resources:** Farizal Rizky Muharram, Hanif Ardiansyah Sulistya, Fikri Febrian Firmansyah, Julian

420 Benedict Swannjo, Muhammad Masrur Rizal, Alifina Izza

421 **Supervision:** Achmad Chusnu Romdhoni, Muhammad Atoillah Isfandiari, Ninuk Dwi Ariningtyas

422 **Writing – original draft:** Farizal Rizky Muharram, Hanif Ardiansyah Sulistya, Julian Benedict

423 Swannjo, Muhammad Masrur Rizal, Alifina Izza

424 **Writing – review & editing:** Farizal Rizky Muharram, Sudhir Anand, Hanif Ardiansyah Sulistya, ,

425 Julian Benedict Swannjo, Alifina Izza, Muhammad Atoillah Isfandiari, Ninuk Dwi Ariningtyas

426

427 **Acknowledgments**

428

429 **REFERENCES**

- 430 1. Jaeger FN, Bechir M, Harouna M, Moto DD, Utzinger J. Challenges and opportunities  
431 for healthcare workers in a rural district of Chad. *BMC Health Serv Res* [Internet].  
432 2018 Jan 8 [cited 2023 Nov 22];18(1):1–11. Available from:  
433 <https://bmchealthservres.biomedcentral.com/articles/10.1186/s12913-017-2799-6>
- 434 2. Jacobs B, Ir P, Bigdeli M, Annear PL, Van Damme W. Addressing access barriers to  
435 health services: an analytical framework for selecting appropriate interventions in low-  
436 income Asian countries. *Health Policy Plan* [Internet]. 2012 Jul 1 [cited 2023 Nov  
437 22];27(4):288–300. Available from: <https://dx.doi.org/10.1093/heapol/czr038>
- 438 3. Singh Thakur J, Nangia R, Singh S. Progress and challenges in achieving  
439 noncommunicable diseases targets for the sustainable development goals. *FASEB*  
440 *Bioadv* [Internet]. 2021 Aug 1 [cited 2023 Nov 22];3(8):563–8. Available from:  
441 <https://onlinelibrary.wiley.com/doi/full/10.1096/fba.2020-00117>
- 442 4. Leosari Id Y, Uelmen JA, Marc R, Id C. Spatial evaluation of healthcare accessibility  
443 across archipelagic communities of Maluku Province, Indonesia. *PLOS Global Public*  
444 *Health* [Internet]. 2023 Mar 9 [cited 2023 Nov 22];3(3):e0001600. Available from:  
445 <https://journals.plos.org/globalpublichealth/article?id=10.1371/journal.pgph.0001600>
- 446 5. Dwi Laksono A, Dwi Wulandari R, Rohmah N, Rukmini R, Tumaji T. Basic Health  
447 Survey. *BMJ Open* [Internet]. 2023 [cited 2023 Nov 22];13:64532. Available from:  
448 <http://bmjopen.bmj.com/>
- 449 6. Meliala A, Hort K, Trisnantoro L. Addressing the unequal geographic distribution of  
450 specialist doctors in Indonesia: The role of the private sector and effectiveness of  
451 current regulations. *Soc Sci Med*. 2013 Apr 1;82:30–4.
- 452 7. Crisp N, Gawanas B, Sharp I. Training the health workforce: scaling up, saving lives.  
453 *The Lancet* [Internet]. 2008 Feb 23 [cited 2023 Nov 22];371(9613):689–91. Available  
454 from: <http://www.thelancet.com/article/S0140673608603098/fulltext>
- 455 8. Efendi F, Haryanto J, Indarwati R, Kuswanto H, Ulfiana E, Has EMM, et al. Going  
456 Global: Insights of Indonesian Policymakers on International Migration of Nurses. *J*  
457 *Multidiscip Healthc* [Internet]. 2021 Nov 26 [cited 2023 Nov 22];14:3285–93.  
458 Available from: [https://www.dovepress.com/going-global-insights-of-indonesian-](https://www.dovepress.com/going-global-insights-of-indonesian-policymakers-on-international-migr-peer-reviewed-fulltext-article-JMDH)  
459 [policymakers-on-international-migr-peer-reviewed-fulltext-article-JMDH](https://www.dovepress.com/going-global-insights-of-indonesian-policymakers-on-international-migr-peer-reviewed-fulltext-article-JMDH)
- 460 9. Meilianti S, Smith F, Kristianto F, Himawan R, Ernawati DK, Naya R, et al. A  
461 national analysis of the pharmacy workforce in Indonesia. *Hum Resour Health*  
462 [Internet]. 2022 Dec 1 [cited 2023 Nov 22];20(1):1–12. Available from:  
463 [https://human-resources-health.biomedcentral.com/articles/10.1186/s12960-022-](https://human-resources-health.biomedcentral.com/articles/10.1186/s12960-022-00767-4)  
464 [00767-4](https://human-resources-health.biomedcentral.com/articles/10.1186/s12960-022-00767-4)
- 465 10. Anderson I, Meliala A, Marzoeki P, Pambudi E. The Production, Distribution, and  
466 Performance of Physicians, Nurses, and Midwives in Indonesia: An Update. *Health,*  
467 *Nutrition and Population (HNP) Discussion Paper Series* [Internet]. 2014 [cited 2023  
468 Nov 22]; Available from: <https://ideas.repec.org/p/wbk/hnpdps/91324.html>
- 469 11. Homepage J, Sutrisno S. Shortages of Medical Doctors in Indonesia, Is It True? *Asian*  
470 *Journal of Health Research* [Internet]. 2023 Aug 11 [cited 2023 Nov 22];2(2):1–2.  
471 Available from: <https://a-jhr.com/a-jhr/article/view/121>
- 472 12. Laksono AD, Ridlo IA, Ernawaty. DISTRIBUTION ANALYSIS OF DOCTORS IN  
473 INDONESIA. *Indonesian Journal of Health Administration* [Internet]. 2020 Mar 28  
474 [cited 2023 Nov 22];8(1):29–39. Available from: [https://e-](https://e-journal.unair.ac.id/JAKI/article/view/14351)  
475 [journal.unair.ac.id/JAKI/article/view/14351](https://e-journal.unair.ac.id/JAKI/article/view/14351)
- 476 13. Indonesia. Law no. 36 of 2014 on Health Care Personnel. 2014. 2014 [cited 2023 Nov  
477 22]; Available from: [www.indolaw.org](http://www.indolaw.org)
- 478 14. Indonesia. Law no. 17 of 2023 on Health. 2023. [Internet]. 2023 [cited 2023 Nov 22].  
479 Available from: <https://peraturan.bpk.go.id/Details/258028/uu-no-17-tahun-2023>
- 480 15. Direktorat Perencanaan Tenaga Kesehatan KKI. Dokumen Target Rasio Tenaga  
481 Kesehatan. 2022;
- 482 16. Kumar R, Pal R. India achieves WHO recommended doctor population ratio: A call  
483 for paradigm shift in public health discourse! *J Family Med Prim Care*. 2018;7(5):841.

- 484 17. Pandya VS, Sampath N, Yadav R, Mahuli A V, Kapadiya JD. Dental Manpower in  
485 India: changing trends upto 2020. *Journal of Xidian University*. 2021 Jul 3;15(7).  
486 18. The White Ribbon Alliance. A COUNT OF BEDSIDE MIDWIVES IN MALAWI.  
487 2017.  
488 19. World Health Organization. Global strategy on human resources for health: Workforce  
489 2030. 2016.  
490 20. Achim Zeileis, Christian Kleiber. *ineq: Measuring Inequality, Concentration, and*  
491 *Poverty* [Internet]. 2014 [cited 2022 Dec 2]. Available from: [https://CRAN.R-](https://CRAN.R-project.org/package=ineq)  
492 [project.org/package=ineq](https://CRAN.R-project.org/package=ineq)  
493 21. Jin J, Wang J, Ma X, Wang Y, Li R. Equality of Medical Health Resource Allocation  
494 in China Based on the Gini Coefficient Method [Internet]. Vol. 44, *Iran J Public*  
495 *Health*. 2015. Available from: <http://ijph.tums.ac.ir>  
496 22. Panzera D, Postiglione P. Measuring the Spatial Dimension of Regional Inequality:  
497 An Approach Based on the Gini Correlation Measure. *Soc Indic Res*. 2020 Apr  
498 1;148(2):379–94.  
499 23. Hermawan A. Analisis Distribusi Tenaga Kesehatan (Dokter Perawat Dan Bidan) Di  
500 Indonesia Pada 2013 Dengan Menggunakan Gini Index. *Buletin Penelitian Sistem*  
501 *Kesehatan*. 2019;22(3):167–75.  
502 24. Saito E, Gilmour S, Yoneoka D, Gautam GS, Rahman MM, Shrestha PK, et al.  
503 Inequality and inequity in healthcare utilization in urban Nepal: A cross-sectional  
504 observational study. *Health Policy Plan*. 2016 Sep 1;31(7):817–24.  
505 25. Anyangwe SCE, Mtonga C. Inequities in the Global Health Workforce: The Greatest  
506 Impediment to Health in Sub-Saharan Africa [Internet]. Vol. 4, *Int. J. Environ. Res.*  
507 *Public Health*. 2007. Available from: [www.ijerph.org](http://www.ijerph.org)  
508 26. Boniol M, McCarthy C, Lawani D, Guillot G, McIsaac M, Diallo K. Inequal  
509 distribution of nursing personnel: a subnational analysis of the distribution of nurses  
510 across 58 countries. *Hum Resour Health*. 2022 Dec 1;20(1).  
511 27. Boniol M, McCarthy C, Lawani D, Guillot G, McIsaac M, Diallo K. Inequal  
512 distribution of nursing personnel: a subnational analysis of the distribution of nurses  
513 across 58 countries. *Hum Resour Health*. 2022 Dec 1;20(1).  
514 28. Global strategy on human resources for health: Workforce 2030.  
515 29. WHO - Guideline on health policy and system support to optimize community health  
516 worker programmes.  
517 30. Global strategy on human resources for health: workforce 2030 Reaffirming the  
518 continuing importance of the application of the WHO Global Code of Practice on the  
519 International Recruitment of Health Personnel (hereinafter “WHO Global Code”); 2  
520 [Internet]. 2016. Available from: <https://sustainabledevelopment.un.org/?menu=1300>  
521 31. Bank W, Penh P, Kanchanachitra C, Lindelow M, Johnston T, Hanvoravongchai P, et  
522 al. Health in Southeast Asia 5 Human resources for health in southeast Asia:  
523 shortages, distributional challenges, and international trade in health services. *Lancet*  
524 [Internet]. 2011;377:769–81. Available from: [www.thelancet.com](http://www.thelancet.com)  
525 32. Afenyadu GY, Adegoke AA, Findley S. Improving Human Resources for Health  
526 means Retaining Health-Workers: Application of the WHO-Recommendations for the  
527 Retention of Health-Workers in Rural Northern-Nigeria. *J Health Care Poor*  
528 *Underserved* [Internet]. 2017 [cited 2023 Nov 18];28(3):1066–86. Available from:  
529 <https://pubmed.ncbi.nlm.nih.gov/28804079/>  
530 33. Lu H, Hou L, Zhou W, Shen L, Jin S, Wang M, et al. Original research: Trends,  
531 composition and distribution of nurse workforce in China: a secondary analysis of  
532 national data from 2003 to 2018. *BMJ Open* [Internet]. 2021 Oct 27 [cited 2023 Nov  
533 18];11(10). Available from: [/pmc/articles/PMC8552175/](https://pubmed.ncbi.nlm.nih.gov/39852175/)  
534 34. Karan A, Negandhi H, Hussain S, Zapata T, Mairembam D, De Graeve H, et al. Size,  
535 composition and distribution of health workforce in India: why, and where to invest?  
536 *Hum Resour Health* [Internet]. 2021 Dec 1 [cited 2023 Nov 18];19(1):39. Available  
537 from: [/pmc/articles/PMC7983088/](https://pubmed.ncbi.nlm.nih.gov/3983088/)

- 538 35. Robyn PJ, Shroff Z, Zang OR, Kingue S, Djenouassi S, Kouontchou C, et al.  
539 Addressing health workforce distribution concerns: a discrete choice experiment to  
540 develop rural retention strategies in Cameroon. *Int J Health Policy Manag* [Internet].  
541 2015 [cited 2023 Nov 18];4(3):169. Available from: [/pmc/articles/PMC4357984/](https://pubmed.ncbi.nlm.nih.gov/264357984/)  
542 36. Hsu YHE, Lin W, Tien JJ, Tzeng LY. Measuring inequality in physician distributions  
543 using spatially adjusted Gini coefficients. *International Journal for Quality in Health*  
544 *Care*. 2016;28(6):657–64.  
545 37. Ismail M. Regional disparities in the distribution of Sudan’s health resources. *Eastern*  
546 *Mediterranean Health Journal*. 2020 Sep 1;26(9):1105–14.  
547 38. Spatial distribution and associated factors of community based health insurance  
548 coverage in Ethiopia: further analysis of Ethiopian demography and health survey,  
549 2019 | *BMC Public Health* | Full Text [Internet]. [cited 2022 Nov 23]. Available from:  
550 <https://bmcpublihealth.biomedcentral.com/articles/10.1186/s12889-022-13950-y>  
551 39. Zhang T, Xu Y, Ren J, Sun L, Liu C. Inequality in the distribution of health resources  
552 and health services in China: Hospitals versus primary care institutions. *Int J Equity*  
553 *Health*. 2017 Mar 3;16(1).  
554 40. Mirmoeini SM, Shooshtari SSM, Battineni G, Amenta F, Tayebati SK. Policies and  
555 challenges on the distribution of specialists and subspecialists in rural areas of Iran.  
556 Vol. 55, *Medicina (Lithuania)*. MDPI AG; 2019.  
557 41. Anyangwe SCE, Mtonga C. Inequities in the Global Health Workforce: The Greatest  
558 Impediment to Health in Sub-Saharan Africa [Internet]. Vol. 4, *Int. J. Environ. Res.*  
559 *Public Health*. 2007. Available from: [www.ijerph.org](http://www.ijerph.org)  
560 42. Saito E, Gilmour S, Yoneoka D, Gautam GS, Rahman MM, Shrestha PK, et al.  
561 Inequality and inequity in healthcare utilization in urban Nepal: A cross-sectional  
562 observational study. *Health Policy Plan*. 2016 Sep 1;31(7):817–24.  
563 43. Laksono AD, Ridlo IA, Ernawaty E. Distribution Analysis of Doctors in Indonesia.  
564 *Indonesian Journal of Health Administration* [Internet]. 2020 Mar 28;8(1):29–39.  
565 Available from: <https://e-journal.unair.ac.id/JAKI/article/view/14351>  
566 44. Heywood PF, Harahap NP. Human Resources for Health Human resources for health  
567 at the district level in Indonesia: the smoke and mirrors of decentralization. 2009 [cited  
568 2023 Nov 18]; Available from: <http://www.human-resources-health.com/content/7/1/6>  
569 45. Samli A, Hadju V, Soma AS. Spatial analysis of health facilities in Mamuju City,  
570 West Sulawesi. *Enferm Clin* [Internet]. 2020 Oct 1 [cited 2023 Nov 18];30:71–5.  
571 Available from: [https://www.elsevier.es/es-revista-enfermeria-clinica-35-articulo-](https://www.elsevier.es/es-revista-enfermeria-clinica-35-articulo-spatial-analysis-health-facilities-in-S1130862120303570)  
572 [spatial-analysis-health-facilities-in-S1130862120303570](https://www.elsevier.es/es-revista-enfermeria-clinica-35-articulo-spatial-analysis-health-facilities-in-S1130862120303570)  
573 46. Sumber Daya Manusia K, Sumber Daya Manusia Kesehatan pada Fasilitas Kesehatan  
574 Tingkat Pertama dalam Era Jaminan K, Yuyun Yuniar Pusat Penelitian dan  
575 Pengembangan Sumber Daya dan Pelayanan Kesehatan dan. Ketersediaan Sumber  
576 Daya Manusia Kesehatan pada Fasilitas Kesehatan Tingkat Pertama dalam Era  
577 Jaminan Kesehatan Nasional di Delapan Kabupaten-Kota di Indonesia. *Media*  
578 *Penelitian dan Pengembangan Kesehatan* [Internet]. 2016 [cited 2023 Nov  
579 18];26(4):201–10. Available from: <https://www.neliti.com/publications/179261/>  
580 47. Rao KD, Shahrawat R, Bhatnagar A. Composition and distribution of the health  
581 workforce in India: estimates based on data from the National Sample Survey. *WHO*  
582 *South East Asia J Public Health* [Internet]. 2016 Sep 1 [cited 2023 Nov 18];5(2):133–  
583 40. Available from: <https://pubmed.ncbi.nlm.nih.gov/28607241/>  
584 48. Meliala A, Hort K, Trisnantoro L. Addressing the unequal geographic distribution of  
585 specialist doctors in Indonesia: The role of the private sector and effectiveness of  
586 current regulations. *Soc Sci Med*. 2013 Apr;82:30–4.  
587 49. Anand S. Methods for measuring health workforce inequalities: methods and  
588 application to China and India. *Human Resources for Health Observer* [Internet]. 2010  
589 [cited 2023 Nov 21];5:1–32. Available from:  
590 <http://www.who.int/hrh/resources/observer/en/>

- 591  
592  
593  
594  
595  
596  
597  
598  
599  
600  
601  
602  
603  
604  
605  
606  
607  
608  
609  
610  
611  
612  
613  
614  
615  
616
50. Organization WH, Anand S, Fan V. The health workforce in India [Internet]. Geneva: World Health Organization; 2016. (Human Resources for Health Observer Series, 16). Available from: <https://iris.who.int/handle/10665/250369>
  51. Utomo B, Sucharya PK, Utami FR. Priorities and realities: Addressing the rich-poor gaps in health status and service access in Indonesia. Vol. 10, International Journal for Equity in Health. 2011.
  52. World Health Organization. Global strategy on human resources for health: Workforce 2030. 2016.
  53. Pagaiya N, Kongkam L, Sriratana S. Rural retention of doctors graduating from the rural medical education project to increase rural doctors in Thailand: A cohort study. Hum Resour Health [Internet]. 2015 Mar 1 [cited 2023 Nov 18];13(1):1–8. Available from: <https://human-resources-health.biomedcentral.com/articles/10.1186/s12960-015-0001-y>
  54. Mahendradhata Y, Andayani NLPE, Hasri ET, Arifi MD, Siahaan RGM, Solikha DA, et al. The Capacity of the Indonesian Healthcare System to Respond to COVID-19. Front Public Health. 2021 Jul 7;9.
  55. Mahmood MA, Hendarto H, Laksana MAC, Damayanti HE, Suhargono MH, Pranadyan R, et al. Health system and quality of care factors contributing to maternal deaths in East Java, Indonesia. PLoS One. 2021 Feb 1;16(2 February).
  56. Sejati EN, Rosa EM, Pramesona BA. Trends and Determinants of the Maternal Mortality Ratio Based on Healthcare Resources. Unnes Journal of Public Health. 2023 Mar 1;12(1):1–11.
  57. Suparmi, Kusumawardani N, Nambiar D, Trihono, Hosseinpoor AR. Subnational regional inequality in the public health development index in Indonesia. Glob Health Action. 2018 Dec 3;11(sup1).

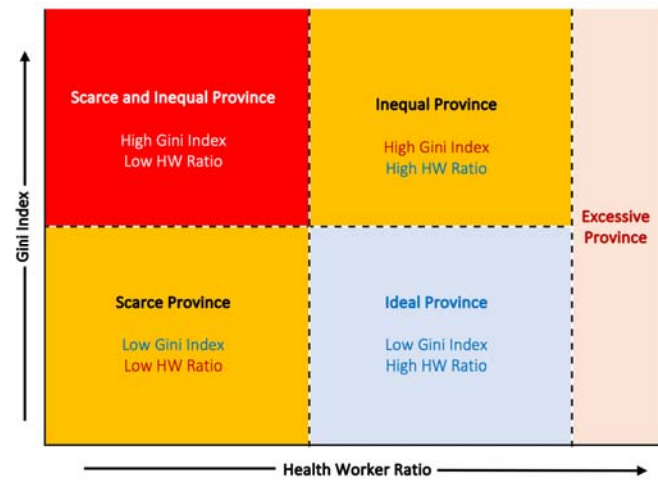

1

**Figure 1.** A Quadrant Analysis of Gini Index vs. Health Worker Ratio

2

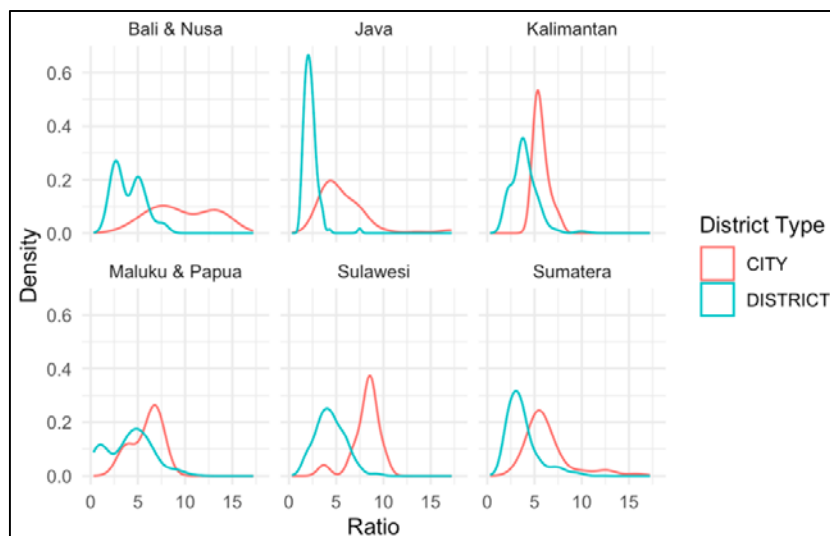

3  
4  
5  
6  
7  
8  
9  
10

**Figure 2. Regional Health Worker Distribution by City and District: A Density Plot Comparison.** This set of density plots compares the distribution of health worker ratios across different Indonesian regions, distinguishing between city and district types. Peaks represent the most common ratios within each region, with red lines indicating city densities and blue lines for districts. The plots reveal variations in distribution patterns, with some regions showing distinct differences between city and district densities, potentially indicating disparities in health worker allocation.



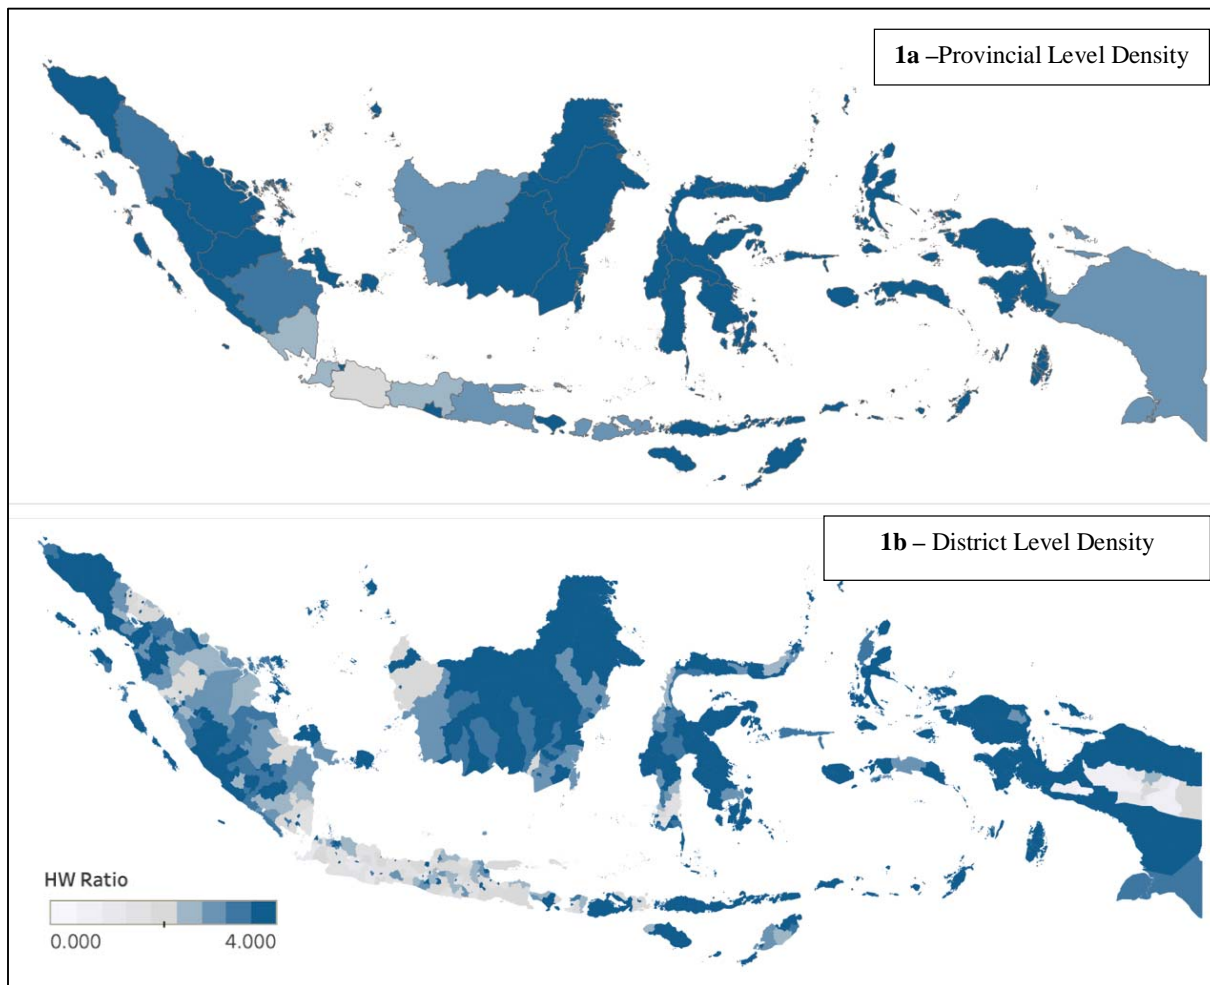

11  
12  
13  
14  
15  
16  
17  
18

**Figure 3. Geographic Distribution of Health Worker Ratios in Indonesia: A Comparative View at Provincial and District Levels.** This map pair illustrates the health worker (HW) ratio across Indonesia's provinces (1a) and districts (1b). Darker shades of blue indicate higher HW ratios, with the scale ranging from 0 to 4. The provincial-level map shows broader trends, while the district-level map provides a more granified perspective, revealing significant variations within provinces.

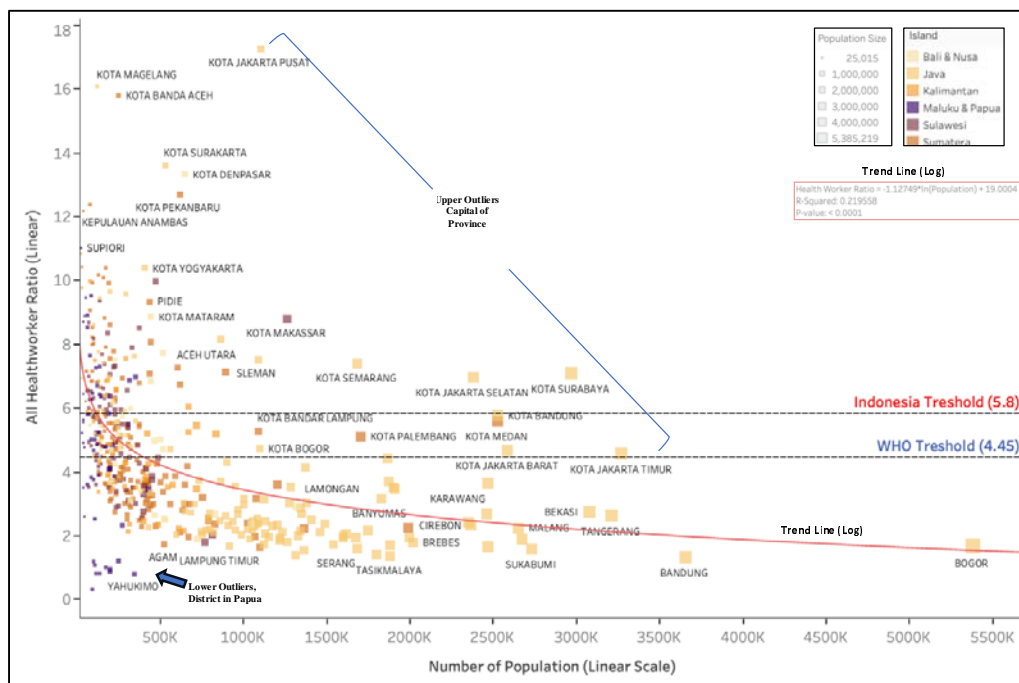

19 **Figure 4. Population vs. Health Worker Ratio Across Indonesian Regions: Scaling and WHO Standards**  
20 **Compliance.** The scatter plot displays the relationship between the logarithm of the population size and the health  
21 worker ratio for various Indonesian regions. Each point represents a region, with the WHO-recommended ratio as a  
22 reference line. The plot highlights disparities in health worker distribution relative to population, with some regions  
23 significantly above or below the WHO benchmark.  
24

25

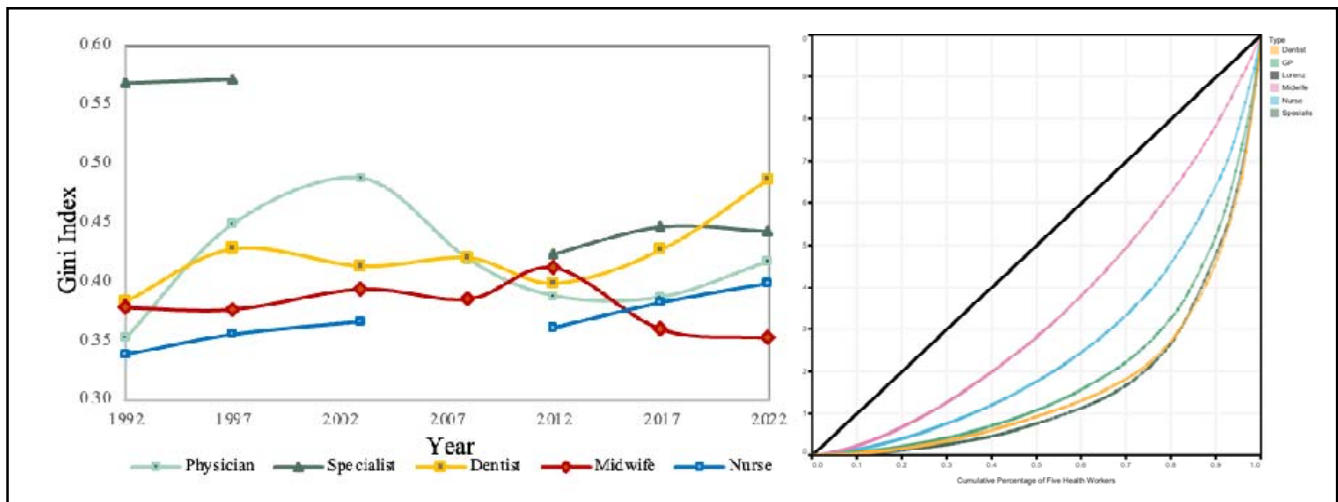

26 **Figure 5. Trends and Disparities in Health Worker Distribution: Gini Index Over Time and Lorenz Curve**  
27 **Analysis.** The graph comprises two panels: the left shows the Gini Index for different health worker over 30  
28 years, indicating inequality levels within each sector. The right panel's Lorenz Curves visualize the actual  
29 distribution equity for these professions. Each color represents a distinct healthcare role, ensuring consistency  
30 across both visual analyses.

31

32

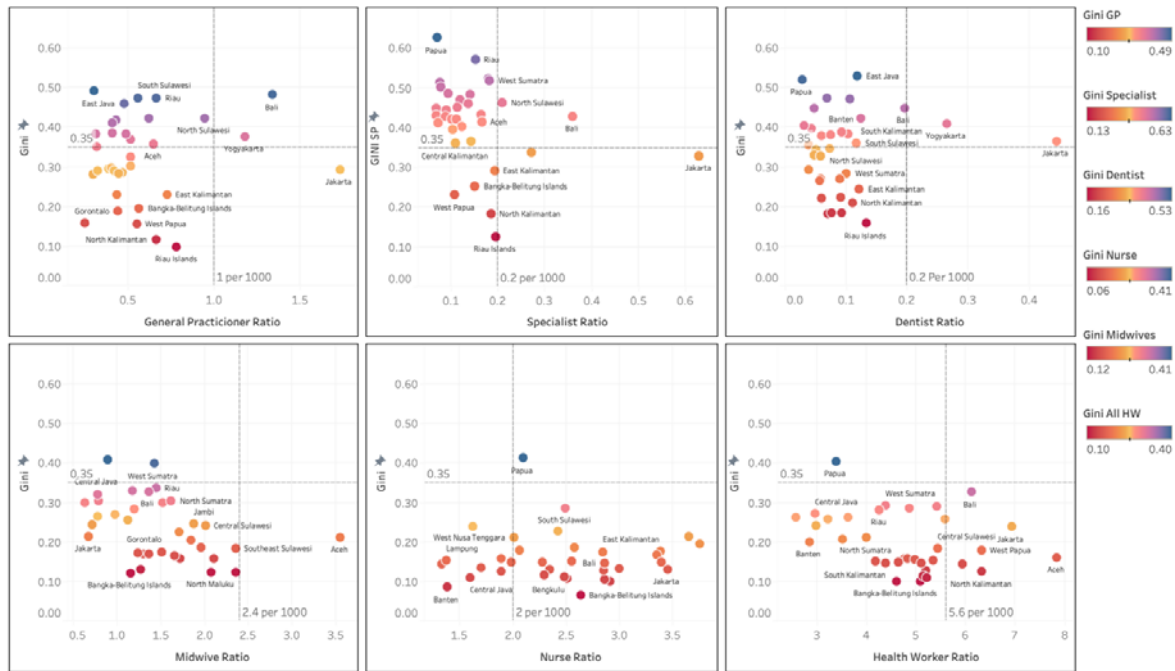

33 **Figure 6. Comparative Analysis of Health Worker Distribution Across Regions: Gini Index vs.**  
 34 **Various Health Worker Ratios.** (Each scatter plot represents a different category of health workers, with  
 35 the Gini index on the vertical axis and the respective health worker ratio on the horizontal axis. Dot  
 36 represents a province, with blue shades indicating regions with a higher Gini of health. The dashed line for  
 37 Gini referenced 0.35 Gini Ratio, the target for equality. Dashed line for Ratio referenced to national Target  
 38 for each health worker)  
 39

1

| <b>Health Worker</b>     | <b>National Target Ratio</b> | <b>Others Recommended Ratio</b> | <b>Source</b>                                                    |
|--------------------------|------------------------------|---------------------------------|------------------------------------------------------------------|
| <b>GP</b>                | 1:1000                       | 1:1000                          | Kumar <i>et.al.</i> , 2018 <sup>16</sup>                         |
| <b>Specialist</b>        | 0.2:1000                     | 1:1000                          | WHO                                                              |
| <b>Dentist</b>           | 0.2:1000                     | 0.13:1000                       | Pandya, <i>et.al.</i> , 2020 <sup>17</sup>                       |
| <b>Nurse</b>             | 2.4:1000                     | 3.3:1000                        | WHO                                                              |
| <b>Midwifery</b>         | 2:1000                       | 11.4:1000 (female)              | The White Ribbon Alliance. 2017 <sup>18</sup>                    |
| <b>All Health Worker</b> | 5.8:1000                     | 4.45: 1000                      | WHO: Global strategy on human resources for health <sup>19</sup> |

2

3

4

**Table 2.** Descriptive Statistics of Healthcare Economic Indicators and Workforce Ratios in Indonesia

|                            | Min   | 25%    | Median  | Mean       | 75%     | Max     | Skewness | Kurtosis |
|----------------------------|-------|--------|---------|------------|---------|---------|----------|----------|
| <b>NATIONAL</b>            |       |        |         |            |         |         |          |          |
| Population                 | 25015 | 425613 | 1056965 | 1283218.61 | 1865647 | 5385219 | 2.73     | 10.41    |
| Fiscal Capacity            | 243   | 850    | 1297    | 2256.74    | 2510    | 11391   | 5.22     | 32.59    |
| GNI Per Capita PPP         | 4190  | 9840   | 10913   | 11694.83   | 12522   | 24221   | 0.74     | 1.78     |
| Physician Ratio            | 0.02  | 0.22   | 0.31    | 0.53       | 0.63    | 5.42    | 4.28     | 26.7     |
| Specialist Ratio           | 0     | 0.05   | 0.08    | 0.15       | 0.16    | 1.86    | 4.37     | 28.97    |
| Dentist Ratio              | 0     | 0.03   | 0.05    | 0.10       | 0.10    | 1.52    | 6.42     | 63.73    |
| Midwife Ratio              | 0.07  | 0.67   | 0.86    | 1.10       | 1.36    | 5.16    | 1.04     | 1.30     |
| Nurse Ratio                | 0.22  | 1.07   | 1.44    | 1.95       | 2.54    | 12.03   | 1.63     | 4.53     |
| <b>Healthworker Ratio</b>  | 0.31  | 2.21   | 3.09    | 3.84       | 4.97    | 19.08   | 1.45     | 3.91     |
| <b>REGENCIES (n = 426)</b> |       |        |         |            |         |         |          |          |
| Population                 | 25015 | 417509 | 1024842 | 1231418.51 | 1679267 | 5385219 | 2.98     | 13.47    |
| Fiscal Capacity            | 243   | 803    | 1187    | 1575.09    | 1857    | 6209    | 3.29     | 15.03    |
| GNI Per Capita PPP         | 4190  | 9446   | 10588   | 10530.34   | 11609   | 18927   | 0.06     | 0.97     |
| Physician Ratio            | 0.02  | 0.21   | 0.27    | 0.31       | 0.35    | 2.27    | 3.6      | 22.57    |
| Specialist Ratio           | 0     | 0.05   | 0.06    | 0.08       | 0.10    | 0.57    | 2.86     | 15.22    |
| Dentist Ratio              | 0     | 0.03   | 0.05    | 0.05       | 0.06    | 0.52    | 3.98     | 28.01    |
| Midwife Ratio              | 0.07  | 0.68   | 0.87    | 1.13       | 1.45    | 5.16    | 0.99     | 1.16     |
| Nurse Ratio                | 0.22  | 0.98   | 1.26    | 1.50       | 1.8     | 7.16    | 1.18     | 1.79     |
| <b>Healthworker Ratio</b>  | 0.31  | 2.04   | 2.6     | 3.08       | 3.68    | 12.48   | 0.9      | 0.94     |
| <b>CITIES (n=88)</b>       |       |        |         |            |         |         |          |          |
| Population                 | 34096 | 531570 | 1266194 | 1472195.8  | 2470972 | 3274716 | 1.94     | 2.97     |
| Fiscal Capacity            | 374   | 1188   | 3518    | 4743.54    | 6448    | 11391   | 2.62     | 6.02     |
| GNI Per Capita PPP         | 7519  | 13803  | 15503   | 15943.14   | 18199   | 24221   | 0.63     | 1.32     |
| Physician Ratio            | 0.21  | 0.82   | 1.10    | 1.34       | 1.58    | 5.42    | 2.61     | 8.41     |
| Specialist Ratio           | 0.02  | 0.25   | 0.35    | 0.42       | 0.51    | 1.86    | 2.52     | 9.04     |
| Dentist Ratio              | 0.02  | 0.13   | 0.20    | 0.27       | 0.35    | 1.52    | 3.98     | 20.64    |
| Midwife Ratio              | 0.51  | 0.61   | 0.86    | 1.00       | 1.1     | 3.75    | 1.14     | 1.17     |
| Nurse Ratio                | 1.55  | 2.54   | 3.18    | 3.61       | 4.16    | 12.03   | 1.46     | 3.01     |
| <b>Healthworker Ratio</b>  | 3.1   | 4.97   | 5.94    | 6.64       | 7.62    | 19.08   | 1.53     | 2.88     |

5

6

7

**Table 3. Healthcare Workforce Distribution by Region: Population-to-Health Worker Ratios in Indonesia.**  
The ratios are calculated per 1,000 population.

| REGIONAL GROUP            | POP                | GP            |       | Specialist   |       | Dentist      |       | Nurse         |       | Midwife       |       | All HW         |       |
|---------------------------|--------------------|---------------|-------|--------------|-------|--------------|-------|---------------|-------|---------------|-------|----------------|-------|
|                           |                    | n             | Ratio | n            | Ratio | n            | Ratio | n             | Ratio | n             | Ratio | n              | Ratio |
| <b>NATIONAL</b>           | <b>272,235,314</b> | <b>145602</b> | 0.53  | <b>41891</b> | 0.15  | <b>27177</b> | 0.10  | <b>531214</b> | 1.95  | <b>300756</b> | 1.10  | <b>1046640</b> | 3.84  |
| <b>CITY</b>               | <b>58,567,886</b>  | 78557         | 1.34  | 24772        | 0.42  | 15608        | 0.27  | 211326        | 3.61  | 58721         | 1.00  | 388984         | 6.64  |
| <b>DISTRICT</b>           | <b>213,667,428</b> | 67045         | 0.31  | 17119        | 0.08  | 11569        | 0.05  | 319888        | 1.50  | 242035        | 1.13  | 657656         | 3.08  |
| <b>BALI NUSA</b>          | <b>15,028,974</b>  | <b>9139</b>   | 0.61  | <b>2326</b>  | 0.15  | <b>1259</b>  | 0.08  | <b>36937</b>  | 2.46  | <b>22769</b>  | 1.52  | <b>72430</b>   | 4.82  |
| Bali                      | 4,287,193          | 5754          | 1.34  | 1541         | 0.36  | 839          | 0.20  | 12261         | 2.86  | 5835          | 1.36  | 26230          | 6.12  |
| West Nusa Tenggara        | 5,359,579          | 1657          | 0.31  | 413          | 0.08  | 212          | 0.04  | 10779         | 2.01  | 6393          | 1.19  | 19454          | 3.63  |
| East Nusa Tenggara        | 5,382,202          | 1728          | 0.32  | 372          | 0.07  | 208          | 0.04  | 13897         | 2.58  | 10541         | 1.96  | 26746          | 4.97  |
| <b>JAVA</b>               | <b>153,344,799</b> | <b>84221</b>  | 0.55  | <b>25848</b> | 0.17  | <b>17476</b> | 0.11  | <b>259769</b> | 1.69  | <b>110580</b> | 0.72  | <b>497894</b>  | 3.25  |
| Banten                    | 12,142,696         | 6220          | 0.51  | 1745         | 0.14  | 1136         | 0.09  | 16764         | 1.38  | 8719          | 0.72  | 34584          | 2.85  |
| D.I. Yogyakarta           | 3,677,522          | 4343          | 1.18  | 997          | 0.27  | 975          | 0.27  | 10715         | 2.91  | 2890          | 0.79  | 19920          | 5.42  |
| D.K.I. Jakarta            | 11,249,585         | 19493         | 1.73  | 7071         | 0.63  | 5002         | 0.44  | 38819         | 3.45  | 7582          | 0.67  | 77967          | 6.93  |
| West Java                 | 48,623,371         | 19863         | 0.41  | 5803         | 0.12  | 3357         | 0.07  | 65009         | 1.34  | 30922         | 0.64  | 124954         | 2.57  |
| Central Java              | 37,323,519         | 15156         | 0.41  | 4528         | 0.12  | 2224         | 0.06  | 59749         | 1.60  | 28892         | 0.77  | 110549         | 2.96  |
| East Java                 | 40,328,106         | 19146         | 0.47  | 5704         | 0.14  | 4782         | 0.12  | 68713         | 1.70  | 31575         | 0.78  | 129920         | 3.22  |
| <b>KALIMANTAN</b>         | <b>16,779,243</b>  | <b>8089</b>   | 0.48  | <b>2240</b>  | 0.13  | <b>1442</b>  | 0.09  | <b>41324</b>  | 2.46  | <b>21984</b>  | 1.31  | <b>75079</b>   | 4.47  |
| West Kalimantan           | 5,482,046          | 1632          | 0.30  | 404          | 0.07  | 236          | 0.04  | 10876         | 1.98  | 6160          | 1.12  | 19308          | 3.52  |
| South Kalimantan          | 4,069,123          | 2087          | 0.51  | 668          | 0.16  | 504          | 0.12  | 9283          | 2.28  | 5292          | 1.30  | 17834          | 4.38  |
| Central Kalimantan        | 2,672,790          | 1112          | 0.42  | 294          | 0.11  | 156          | 0.06  | 7637          | 2.86  | 4435          | 1.66  | 13634          | 5.10  |
| East Kalimantan           | 3,847,792          | 2790          | 0.73  | 743          | 0.19  | 468          | 0.12  | 10943         | 2.84  | 4882          | 1.27  | 19826          | 5.15  |
| North Kalimantan          | 707,492            | 468           | 0.66  | 131          | 0.19  | 78           | 0.11  | 2585          | 3.65  | 1215          | 1.72  | 4477           | 6.33  |
| <b>MALUKU &amp; PAPUA</b> | <b>8,634,347</b>   | <b>3412</b>   | 0.40  | <b>717</b>   | 0.08  | <b>341</b>   | 0.04  | <b>23000</b>  | 2.66  | <b>11254</b>  | 1.30  | <b>38724</b>   | 4.48  |
| Maluku                    | 1,886,735          | 920           | 0.49  | 171          | 0.09  | 90           | 0.05  | 6330          | 3.36  | 2575          | 1.36  | 10086          | 5.35  |
| North Maluku              | 1,317,333          | 571           | 0.43  | 117          | 0.09  | 63           | 0.05  | 3365          | 2.55  | 2740          | 2.08  | 6856           | 5.20  |
| Papua                     | 4,272,108          | 1282          | 0.30  | 303          | 0.07  | 120          | 0.03  | 8961          | 2.10  | 3798          | 0.89  | 14464          | 3.39  |
| West Papua                | 1,158,171          | 639           | 0.55  | 126          | 0.11  | 68           | 0.06  | 4344          | 3.75  | 2141          | 1.85  | 7318           | 6.32  |
| <b>SULAWESI</b>           | <b>19,989,579</b>  | <b>10662</b>  | 0.53  | <b>2981</b>  | 0.15  | <b>1833</b>  | 0.09  | <b>54455</b>  | 2.72  | <b>33924</b>  | 1.70  | <b>103855</b>  | 5.20  |
| Gorontalo                 | 1,203,921          | 531           | 0.44  | 148          | 0.12  | 72           | 0.06  | 3017          | 2.51  | 1815          | 1.51  | 5583           | 4.64  |
| West Sulawesi             | 1,441,712          | 360           | 0.25  | 100          | 0.07  | 102          | 0.07  | 3382          | 2.35  | 3401          | 2.36  | 7345           | 5.09  |
| South Sulawesi            | 8,980,741          | 4994          | 0.56  | 1611         | 0.18  | 1051         | 0.12  | 22365         | 2.49  | 13716         | 1.53  | 43737          | 4.87  |
| Central Sulawesi          | 3,074,958          | 1239          | 0.40  | 315          | 0.10  | 174          | 0.06  | 8789          | 2.86  | 6195          | 2.01  | 16712          | 5.43  |
| South-East Sulawesi       | 2,625,494          | 1017          | 0.39  | 250          | 0.10  | 238          | 0.09  | 7876          | 3.00  | 6195          | 2.36  | 15576          | 5.93  |
| North Sulawesi            | 2,662,753          | 2521          | 0.95  | 557          | 0.21  | 196          | 0.07  | 9026          | 3.39  | 2602          | 0.98  | 14902          | 5.60  |
| <b>SUMATERA</b>           | <b>58,458,372</b>  | <b>30079</b>  | 0.51  | <b>7779</b>  | 0.13  | <b>4826</b>  | 0.08  | <b>115729</b> | 1.98  | <b>100245</b> | 1.71  | <b>258658</b>  | 4.42  |
| Aceh                      | 5,356,965          | 3469          | 0.65  | 889          | 0.17  | 489          | 0.09  | 18178         | 3.39  | 19017         | 3.55  | 42042          | 7.85  |
| Bengkulu                  | 2,041,265          | 903           | 0.44  | 211          | 0.10  | 154          | 0.08  | 5077          | 2.49  | 4294          | 2.10  | 10639          | 5.21  |
| Jambi                     | 3,600,625          | 1684          | 0.47  | 405          | 0.11  | 276          | 0.08  | 8252          | 2.29  | 6763          | 1.88  | 17380          | 4.83  |
| Bangka Belitung Isl.      | 1,464,663          | 826           | 0.56  | 221          | 0.15  | 135          | 0.09  | 3860          | 2.64  | 1696          | 1.16  | 6738           | 4.60  |
| Riau Island               | 2,072,922          | 1623          | 0.78  | 405          | 0.20  | 277          | 0.13  | 5019          | 2.42  | 2567          | 1.24  | 9891           | 4.77  |
| Lampung                   | 8,866,673          | 2803          | 0.32  | 693          | 0.08  | 282          | 0.03  | 12216         | 1.38  | 10458         | 1.18  | 26452          | 2.98  |
| Riau                      | 6,032,801          | 4015          | 0.67  | 917          | 0.15  | 626          | 0.10  | 11405         | 1.89  | 8736          | 1.45  | 25699          | 4.26  |
| West Sumatera             | 5,481,484          | 3398          | 0.62  | 999          | 0.18  | 552          | 0.10  | 11291         | 2.06  | 7800          | 1.42  | 24040          | 4.39  |
| South Sumatera            | 8,489,000          | 3625          | 0.43  | 967          | 0.11  | 431          | 0.05  | 16032         | 1.89  | 14512         | 1.71  | 35567          | 4.19  |
| North Sumatera            | 15,051,94          | 7733          | 0.51  | 2072         | 0.14  | 1604         | 0.11  | 24399         | 1.62  | 24402         | 1.62  | 60210          | 4.00  |

8

9

**Table 4. Provincial and District-Level Inequality in Health Worker Distribution: Gini Index from 1992 to 2022.** This table presents the Gini Index scores for different health worker categories, measuring the inequality in their distribution across provinces from 1992 to 2022 and at the district level in 2022. Data Unavailability is marked as '...'. .

| Health worker | Between Province Gini Index |      |      |      |      |      |      | Between District Gini Index 2022 |
|---------------|-----------------------------|------|------|------|------|------|------|----------------------------------|
|               | 1992                        | 1997 | 2003 | 2008 | 2012 | 2017 | 2022 |                                  |
| GP            | 0.35                        | 0.45 | 0.49 | 0.42 | 0.39 | 0.39 | 0.42 | <b>0.46</b>                      |
| Specialist    | 0.57                        | 0.57 | ...  | ...  | 0.42 | 0.45 | 0.44 | <b>0.53</b>                      |
| Dentist       | 0.38                        | 0.43 | 0.41 | 0.42 | 0.40 | 0.43 | 0.49 | <b>0.52</b>                      |
| Nurse         | 0.34                        | 0.36 | 0.37 | ...  | 0.36 | 0.38 | 0.40 | 0.33                             |
| Midwife       | 0.38                        | 0.38 | 0.39 | 0.39 | 0.41 | 0.36 | 0.35 | 0.31                             |

10
